# Supplementary material for: Archaeal Clusters of Orthologous Genes (arCOGs): An Update and Application for Analysis of Shared Features between Thermococcales, Methanococcales, and Methanobacteriales
Source: Life (Basel). 2015 Mar 10;5(1):818–40. doi: 10.3390/life5010818 (PMC4390880; doi:10.3390/life5010818)
Supplement: Supplementary File 1 [file life-05-00818-s001.zip]

Archive with 5 entries (5 files):
- Table S3.xlsx
- Supplementary Figure S1.pdf
- Supplementary File S4.pdf
- Table S1.xlsx
- Table S2.xls
