# Supplementary material for: Archaeal Clusters of Orthologous Genes (arCOGs): An Update and Application for Analysis of Shared Features between Thermococcales, Methanococcales, and Methanobacteriales
Source: Life (Basel). 2015 Mar 10;5(1):818–40. doi: 10.3390/life5010818 (PMC4390880; doi:10.3390/life5010818)
Supplement: Supplementary File 1 [file life-05-00818-s001.zip › Table S1.xlsx]

## Sheet: Sheet1
Supplementary Table S1 Complete list of archaeal genomes in arCOG database, their arCOG coverage and weights
Genome (as in ftp://ftp.ncbi.nih.gov/genomes/Bacteria)	Taxid	Taxonomy	Lineage assigned in arCOGs	Weight (see Methods)	Coverage (proteins assigned to arCOGs) in 2014	Coverage (proteins assigned to arCOGs) in 2012
Acidianus_hospitalis_W1_uid66875	933801	Crenarchaeota;Thermoprotei;Sulfolobales;Sulfolobaceae;Acidianus;Acidianus hospitalis;Acidianus hospitalis W1	C.Sulfolobi	1.32	0.95234	0.933877
Acidilobus_saccharovorans_345_15_uid51395	666510	Crenarchaeota;Thermoprotei;Acidilobales;Acidilobaceae;Acidilobus;Acidilobus saccharovorans;Acidilobus saccharovorans 345-15	C.Desulfurococci	2.24	0.941333	0.898
Aciduliprofundum_boonei_T469_uid43333	439481	Euryarchaeota;Thermoplasmata-related;Aciduliprofundum;Aciduliprofundum boonei;Aciduliprofundum boonei T469	E.Thermoplasmata	0.964	0.945631	0.877591
Aciduliprofundum_MAR08_339_uid184407	673860	Euryarchaeota;Thermoplasmata-related;Aciduliprofundum;Aciduliprofundum sp. MAR08-339	E.Thermoplasmata	1.16	0.933814	#N/A
Aeropyrum_camini_SY1___JCM_12091_uid222311	1198449	Crenarchaeota;Thermoprotei;Desulfurococcales;Desulfurococcaceae;Aeropyrum;Aeropyrum camini;Aeropyrum camini SY1 = JCM 12091	C.Desulfurococci	1.22	0.958663	#N/A
Aeropyrum_pernix_K1_uid57757	272557	Crenarchaeota;Thermoprotei;Desulfurococcales;Desulfurococcaceae;Aeropyrum;Aeropyrum pernix;Aeropyrum pernix K1	C.Desulfurococci	0.806	0.947059	0.852353
Archaeoglobus_fulgidus_DSM_4304_uid57717	224325	Euryarchaeota;Archaeoglobi;Archaeoglobales;Archaeoglobaceae;Archaeoglobus;Archaeoglobus fulgidus;Archaeoglobus fulgidus DSM 4304	E.Archaeoglobi	1.18	0.928512	0.900826
Archaeoglobus_profundus_DSM_5631_uid43493	572546	Euryarchaeota;Archaeoglobi;Archaeoglobales;Archaeoglobaceae;Archaeoglobus;Archaeoglobus profundus;Archaeoglobus profundus DSM 5631	E.Archaeoglobi	1.13	0.860669	0.819528
Archaeoglobus_sulfaticallidus_PM70_1_uid201033	387631	Euryarchaeota;Archaeoglobi;Archaeoglobales;Archaeoglobaceae;Archaeoglobus;Archaeoglobus sulfaticallidus;Archaeoglobus sulfaticallidus PM70-1	E.Archaeoglobi	1.88	0.900722	#N/A
Archaeoglobus_veneficus_SNP6_uid65269	693661	Euryarchaeota;Archaeoglobi;Archaeoglobales;Archaeoglobaceae;Archaeoglobus;Archaeoglobus veneficus;Archaeoglobus veneficus SNP6	E.Archaeoglobi	1.01	0.911483	0.879426
archaeon_Mx1201_uid196597	1236689	Euryarchaeota;Thermoplasmata;Thermoplasmatales;unclassified Thermoplasmatales;Candidatus Methanomethylophilus;Candidatus Methanomethylophilus alvus;Candidatus Methanomethylophilus alvus Mx1201	E.Thermoplasmata	1.4	0.834746	#N/A
Caldisphaera_lagunensis_DSM_15908_uid183486	1056495	Crenarchaeota;Thermoprotei;Acidilobales;Caldisphaeraceae;Caldisphaera;Caldisphaera lagunensis;Caldisphaera lagunensis DSM 15908	C.Desulfurococci	2.41	0.956022	#N/A
Caldivirga_maquilingensis_IC_167_uid58711	397948	Crenarchaeota;Thermoprotei;Thermoproteales;Thermoproteaceae;Caldivirga;Caldivirga maquilingensis;Caldivirga maquilingensis IC-167	C.Thermoprotei	2.64	0.934284	0.912933
Candidatus_Caldiarchaeum_subterraneum_uid227223	311458	Thaumarchaeota;unclassified Thaumarchaeota (possibly Aigarchaeota);Candidatus Caldiarchaeum;Candidatus Caldiarchaeum subterraneum	Thaumarchaeota	3.66	0.887861	#N/A
Candidatus_Korarchaeum_cryptofilum_OPF8_uid58601	374847	Korarchaeota;Candidatus Korarchaeum;Candidatus Korarchaeum cryptofilum;Candidatus Korarchaeum cryptofilum OPF8	Korarchaeota	3.88	0.91028	0.883489
Candidatus_Nitrosopumilus_AR2_uid176130	1229909	Thaumarchaeota;Nitrosopumilales;Nitrosopumilaceae;Nitrosopumilus;Candidatus Nitrosopumilus sp. AR2	Thaumarchaeota	1.02	0.945289	#N/A
Candidatus_Nitrosopumilus_koreensis_AR1_uid176129	1229908	Thaumarchaeota;Nitrosopumilales;Nitrosopumilaceae;Candidatus Nitrosoarchaeum;Candidatus Nitrosoarchaeum koreensis;Candidatus Nitrosopumilus koreensis AR1	Thaumarchaeota	0.685	0.953968	#N/A
Candidatus_Nitrososphaera_gargensis_Ga9_2_uid176707	1237085	Thaumarchaeota;Nitrososphaerales;Nitrososphaeraceae;Nitrososphaera;Candidatus Nitrososphaera gargensis;Candidatus Nitrososphaera gargensis Ga9.2	Thaumarchaeota	1.73	0.685273	#N/A
Cenarchaeum_symbiosum_A_uid61411	414004	Thaumarchaeota;Cenarchaeales;Cenarchaeaceae;Cenarchaeum;Cenarchaeum symbiosum;Cenarchaeum symbiosum A	Thaumarchaeota	2.8	0.762897	0.735017
Desulfurococcus_fermentans_DSM_16532_uid75119	768672	Crenarchaeota;Thermoprotei;Desulfurococcales;Desulfurococcaceae;Desulfurococcus;Desulfurococcus fermentans;Desulfurococcus fermentans DSM 16532	C.Desulfurococci	0.524	0.978184	#N/A
Desulfurococcus_kamchatkensis_1221n_uid59133	490899	Crenarchaeota;Thermoprotei;Desulfurococcales;Desulfurococcaceae;Desulfurococcus;Desulfurococcus kamchatkensis;Desulfurococcus kamchatkensis 1221n	C.Desulfurococci	0.745	0.936141	0.874235
Desulfurococcus_mucosus_DSM_2162_uid62227	765177	Crenarchaeota;Thermoprotei;Desulfurococcales;Desulfurococcaceae;Desulfurococcus;Desulfurococcus mucosus;Desulfurococcus mucosus DSM 2162	C.Desulfurococci	1.02	0.980669	0.950186
Ferroglobus_placidus_DSM_10642_uid40863	589924	Euryarchaeota;Archaeoglobi;Archaeoglobales;Archaeoglobaceae;Ferroglobus;Ferroglobus placidus;Ferroglobus placidus DSM 10642	E.Archaeoglobi	1.13	0.897581	0.868548
Ferroplasma_acidarmanus_fer1_uid54095	333146	Euryarchaeota;Thermoplasmata;Thermoplasmatales;Ferroplasmaceae;Ferroplasma;Ferroplasma acidarmanus;Ferroplasma acidarmanus fer1	E.Thermoplasmata	2.64	0.873593	#N/A
Fervidicoccus_fontis_Kam940_uid162201	1163730	Crenarchaeota;Thermoprotei;Fervidicoccales;Fervidicoccaceae;Fervidicoccus;Fervidicoccus fontis;Fervidicoccus fontis Kam940	C.Desulfurococci	2.61	0.896751	#N/A
Halalkalicoccus_jeotgali_B3_uid50305	795797	Euryarchaeota;Halobacteria;Halobacteriales;Halobacteriaceae;Halalkalicoccus;Halalkalicoccus jeotgali;Halalkalicoccus jeotgali B3	E.Halobacteria	1.19	0.882004	0.846372
Haloarcula_hispanica_ATCC_33960_uid72475	634497	Euryarchaeota;Halobacteria;Halobacteriales;Halobacteriaceae;Haloarcula;Haloarcula hispanica;Haloarcula hispanica ATCC 33960	E.Halobacteria	0.243	0.991708	0.936771
Haloarcula_hispanica_N601_uid230920	1417673	Euryarchaeota;Halobacteria;Halobacteriales;Halobacteriaceae;Haloarcula;Haloarcula hispanica;Haloarcula hispanica N601	E.Halobacteria	0.243	0.982134	#N/A
Haloarcula_marismortui_ATCC_43049_uid57719	272569	Euryarchaeota;Halobacteria;Halobacteriales;Halobacteriaceae;Haloarcula;Haloarcula marismortui;Haloarcula marismortui ATCC 43049	E.Halobacteria	0.553	0.948645	0.9041
Halobacterium_NRC_1_uid57769	64091	Euryarchaeota;Halobacteria;Halobacteriales;Halobacteriaceae;Halobacterium;Halobacterium salinarum;Halobacterium sp. NRC-1	E.Halobacteria	0.727	0.977888	0.970263
Halobacterium_salinarum_R1_uid61571	478009	Euryarchaeota;Halobacteria;Halobacteriales;Halobacteriaceae;Halobacterium;Halobacterium salinarum;Halobacterium salinarum R1	E.Halobacteria	0.727	0.979629	0.96617
Haloferax_mediterranei_ATCC_33500_uid167315	523841	Euryarchaeota;Halobacteria;Halobacteriales;Halobacteriaceae;Haloferax;Haloferax mediterranei;Haloferax mediterranei ATCC 33500	E.Halobacteria	0.551	0.928035	#N/A
Haloferax_volcanii_DS2_uid46845	309800	Euryarchaeota;Halobacteria;Halobacteriales;Halobacteriaceae;Haloferax;Haloferax volcanii;Haloferax volcanii DS2	E.Halobacteria	0.519	0.927771	0.890162
Halogeometricum_borinquense_DSM_11551_uid54919	469382	Euryarchaeota;Halobacteria;Halobacteriales;Halobacteriaceae;Halogeometricum;Halogeometricum borinquense;Halogeometricum borinquense DSM 11551	E.Halobacteria	0.571	0.92432	0.88353
Halomicrobium_mukohataei_DSM_12286_uid59107	485914	Euryarchaeota;Halobacteria;Halobacteriales;Halobacteriaceae;Halomicrobium;Halomicrobium mukohataei;Halomicrobium mukohataei DSM 12286	E.Halobacteria	0.959	0.94685	0.917289
halophilic_archaeon_DL31_uid72619	756883	Euryarchaeota;Halobacteria;Halobacteriales;Halobacteriaceae;unclassified Halobacteriaceae;halophilic archaeon DL31	E.Halobacteria	1.29	0.918009	0.884638
Halopiger_xanaduensis_SH_6_uid68105	797210	Euryarchaeota;Halobacteria;Halobacteriales;Halobacteriaceae;Halopiger;Halopiger xanaduensis;Halopiger xanaduensis SH-6	E.Halobacteria	0.414	0.950249	0.9095
Haloquadratum_walsbyi_C23_uid162019	768065	Euryarchaeota;Halobacteria;Halobacteriales;Halobacteriaceae;Haloquadratum;Haloquadratum walsbyi;Haloquadratum walsbyi C23	E.Halobacteria	1.13	0.974765	#N/A
Haloquadratum_walsbyi_DSM_16790_uid58673	362976	Euryarchaeota;Halobacteria;Halobacteriales;Halobacteriaceae;Haloquadratum;Haloquadratum walsbyi;Haloquadratum walsbyi DSM 16790	E.Halobacteria	0.341	0.978434	0.916478
Halorhabdus_tiamatea_SARL4B_uid214082	1033806	Euryarchaeota;Halobacteria;Halobacteriales;Halobacteriaceae;Halorhabdus;Halorhabdus tiamatea;Halorhabdus tiamatea SARL4B	E.Halobacteria	0.509	0.932187	#N/A
Halorhabdus_utahensis_DSM_12940_uid59189	519442	Euryarchaeota;Halobacteria;Halobacteriales;Halobacteriaceae;Halorhabdus;Halorhabdus utahensis;Halorhabdus utahensis DSM 12940	E.Halobacteria	0.771	0.948299	0.899266
Halorubrum_lacusprofundi_ATCC_49239_uid58807	416348	Euryarchaeota;Halobacteria;Halobacteriales;Halobacteriaceae;Halorubrum;Halorubrum lacusprofundi;Halorubrum lacusprofundi ATCC 49239	E.Halobacteria	1.15	0.933989	0.896629
Haloterrigena_turkmenica_DSM_5511_uid43501	543526	Euryarchaeota;Halobacteria;Halobacteriales;Halobacteriaceae;Haloterrigena;Haloterrigena turkmenica;Haloterrigena turkmenica DSM 5511	E.Halobacteria	0.416	0.939175	0.897712
Halovivax_ruber_XH_70_uid184819	797302	Euryarchaeota;Halobacteria;Halobacteriales;Halobacteriaceae;Halovivax;Halovivax ruber;Halovivax ruber XH-70	E.Halobacteria	0.919	0.949661	#N/A
Hyperthermus_butylicus_DSM_5456_uid57755	415426	Crenarchaeota;Thermoprotei;Desulfurococcales;Pyrodictiaceae;Hyperthermus;Hyperthermus butylicus;Hyperthermus butylicus DSM 5456	C.Desulfurococci	1.32	0.916459	0.881546
Ignicoccus_hospitalis_KIN4_I_uid58365	453591	Crenarchaeota;Thermoprotei;Desulfurococcales;Desulfurococcaceae;Ignicoccus;Ignicoccus hospitalis;Ignicoccus hospitalis KIN4/I	C.Desulfurococci	2.2	0.85007	0.800558
Ignisphaera_aggregans_DSM_17230_uid51875	583356	Crenarchaeota;Thermoprotei;Desulfurococcales;Desulfurococcaceae;Ignisphaera;Ignisphaera aggregans;Ignisphaera aggregans DSM 17230	C.Desulfurococci	2.54	0.839896	0.814508
Metallosphaera_cuprina_Ar_4_uid66329	1006006	Crenarchaeota;Thermoprotei;Sulfolobales;Sulfolobaceae;Metallosphaera;Metallosphaera cuprina;Metallosphaera cuprina Ar-4	C.Sulfolobi	1.77	0.920197	0.908329
Metallosphaera_sedula_DSM_5348_uid58717	399549	Crenarchaeota;Thermoprotei;Sulfolobales;Sulfolobaceae;Metallosphaera;Metallosphaera sedula;Metallosphaera sedula DSM 5348	C.Sulfolobi	1.31	0.983599	0.964096
Methanobacterium_AL_21_uid63623	868132	Euryarchaeota;Methanobacteria;Methanobacteriales;Methanobacteriaceae;Methanobacterium;Methanobacterium sp. AL-21	E.Methanobacteria	1.11	0.917369	0.877256
Methanobacterium_MB1_uid231690	1379702	Euryarchaeota;Methanobacteria;Methanobacteriales;Methanobacteriaceae;Methanobacterium;Methanobacterium sp. MB1	E.Methanobacteria	1.05	0.942222	#N/A
Methanobacterium_SWAN_1_uid67359	868131	Euryarchaeota;Methanobacteria;Methanobacteriales;Methanobacteriaceae;Methanobacterium;Methanobacterium sp. SWAN-1	E.Methanobacteria	1.06	0.90655	0.869837
Methanobrevibacter_AbM4_uid206516	224719	Euryarchaeota;Methanobacteria;Methanobacteriales;Methanobacteriaceae;Methanobrevibacter;Methanobrevibacter sp. AbM4	E.Methanobacteria	1.42	0.925793	#N/A
Methanobrevibacter_ruminantium_M1_uid45857	634498	Euryarchaeota;Methanobacteria;Methanobacteriales;Methanobacteriaceae;Methanobrevibacter;Methanobrevibacter ruminantium;Methanobrevibacter ruminantium M1	E.Methanobacteria	1.14	0.875056	0.82995
Methanobrevibacter_smithii_ATCC_35061_uid58827	420247	Euryarchaeota;Methanobacteria;Methanobacteriales;Methanobacteriaceae;Methanobrevibacter;Methanobrevibacter smithii;Methanobrevibacter smithii ATCC 35061	E.Methanobacteria	1.39	0.904629	0.856665
Methanocaldococcus_fervens_AG86_uid59347	573064	Euryarchaeota;Methanococci;Methanococcales;Methanocaldococcaceae;Methanocaldococcus;Methanocaldococcus fervens;Methanocaldococcus fervens AG86	E.Methanococci	0.334	0.971555	0.960152
Methanocaldococcus_FS406_22_uid42499	644281	Euryarchaeota;Methanococci;Methanococcales;Methanocaldococcaceae;Methanocaldococcus;Methanocaldococcus sp. FS406-22	E.Methanococci	0.201	0.973032	0.949339
Methanocaldococcus_infernus_ME_uid48803	573063	Euryarchaeota;Methanococci;Methanococcales;Methanocaldococcaceae;Methanocaldococcus;Methanocaldococcus infernus;Methanocaldococcus infernus ME	E.Methanococci	0.932	0.980583	0.976405
Methanocaldococcus_jannaschii_DSM_2661_uid57713	243232	Euryarchaeota;Methanococci;Methanococcales;Methanocaldococcaceae;Methanocaldococcus;Methanocaldococcus jannaschii;Methanocaldococcus jannaschii DSM 2661	E.Methanococci	0.193	0.96725	0.950224
Methanocaldococcus_vulcanius_M7_uid41131	579137	Euryarchaeota;Methanococci;Methanococcales;Methanocaldococcaceae;Methanocaldococcus;Methanocaldococcus vulcanius;Methanocaldococcus vulcanius M7	E.Methanococci	0.587	0.952381	0.93341
Methanocella_arvoryzae_MRE50_uid61623	351160	Euryarchaeota;Methanomicrobia;Methanocellales;Methanocellaceae;Methanocella;Methanocella arvoryzae;Methanocella arvoryzae MRE50	E.Methanomicrobia	1.39	0.903622	#N/A
Methanocella_conradii_HZ254_uid157911	1041930	Euryarchaeota;Methanomicrobia;Methanocellales;Methanocellaceae;Methanocella;Methanocella conradii;Methanocella conradii HZ254	E.Methanomicrobia	1.09	0.948676	#N/A
Methanocella_paludicola_SANAE_uid42887	304371	Euryarchaeota;Methanomicrobia;Methanocellales;Methanocellaceae;Methanocella;Methanocella paludicola;Methanocella paludicola SANAE	E.Methanomicrobia	1.3	0.935419	0.854194
Methanococcoides_burtonii_DSM_6242_uid58023	259564	Euryarchaeota;Methanomicrobia;Methanosarcinales;Methanosarcinaceae;Methanococcoides;Methanococcoides burtonii;Methanococcoides burtonii DSM 6242	E.Methanomicrobia	1.15	0.954245	0.942367
Methanococcus_aeolicus_Nankai_3_uid58823	419665	Euryarchaeota;Methanococci;Methanococcales;Methanococcaceae;Methanococcus;Methanococcus aeolicus;Methanococcus aeolicus Nankai-3	E.Methanococci	1.51	0.98255	0.967785
Methanococcus_maripaludis_C5_uid58741	402880	Euryarchaeota;Methanococci;Methanococcales;Methanococcaceae;Methanococcus;Methanococcus maripaludis;Methanococcus maripaludis C5	E.Methanococci	0.382	0.981339	0.968716
Methanococcus_maripaludis_C6_uid58947	444158	Euryarchaeota;Methanococci;Methanococcales;Methanococcaceae;Methanococcus;Methanococcus maripaludis;Methanococcus maripaludis C6	E.Methanococci	0.36	0.973713	0.961665
Methanococcus_maripaludis_C7_uid58847	426368	Euryarchaeota;Methanococci;Methanococcales;Methanococcaceae;Methanococcus;Methanococcus maripaludis;Methanococcus maripaludis C7	E.Methanococci	0.318	0.989374	0.982662
Methanococcus_maripaludis_S2_uid58035	267377	Euryarchaeota;Methanococci;Methanococcales;Methanococcaceae;Methanococcus;Methanococcus maripaludis;Methanococcus maripaludis S2	E.Methanococci	0.258	0.994774	0.99187
Methanococcus_maripaludis_X1_uid70729	1053692	Euryarchaeota;Methanococci;Methanococcales;Methanococcaceae;Methanococcus;Methanococcus maripaludis;Methanococcus maripaludis X1	E.Methanococci	0.191	0.970254	#N/A
Methanococcus_vannielii_SB_uid58767	406327	Euryarchaeota;Methanococci;Methanococcales;Methanococcaceae;Methanococcus;Methanococcus vannielii;Methanococcus vannielii SB	E.Methanococci	0.98	0.980345	0.973182
Methanococcus_voltae_A3_uid49529	456320	Euryarchaeota;Methanococci;Methanococcales;Methanococcaceae;Methanococcus;Methanococcus voltae;Methanococcus voltae A3	E.Methanococci	1.44	0.90163	0.889924
Methanocorpusculum_labreanum_Z_uid58785	410358	Euryarchaeota;Methanomicrobia;Methanomicrobiales;Methanocorpusculaceae;Methanocorpusculum;Methanocorpusculum labreanum;Methanocorpusculum labreanum Z	E.Methanomicrobia	2.1	0.933448	0.917336
Methanoculleus_bourgensis_MS2_uid171377	1201294	Euryarchaeota;Methanomicrobia;Methanomicrobiales;Methanomicrobiaceae;Methanoculleus;Methanoculleus bourgensis;Methanoculleus bourgensis MS2	E.Methanomicrobia	0.98	0.937763	#N/A
Methanoculleus_marisnigri_JR1_uid58561	368407	Euryarchaeota;Methanomicrobia;Methanomicrobiales;Methanomicrobiaceae;Methanoculleus;Methanoculleus marisnigri;Methanoculleus marisnigri JR1	E.Methanomicrobia	1.02	0.952209	0.91004
Methanohalobium_evestigatum_Z_7303_uid49857	644295	Euryarchaeota;Methanomicrobia;Methanosarcinales;Methanosarcinaceae;Methanohalobium;Methanohalobium evestigatum;Methanohalobium evestigatum Z-7303	E.Methanomicrobia	1.84	0.925466	0.90417
Methanohalophilus_mahii_DSM_5219_uid47313	547558	Euryarchaeota;Methanomicrobia;Methanosarcinales;Methanosarcinaceae;Methanohalophilus;Methanohalophilus mahii;Methanohalophilus mahii DSM 5219	E.Methanomicrobia	1.59	0.962293	0.946204
Methanolobus_psychrophilus_R15_uid177925	1094980	Euryarchaeota;Methanomicrobia;Methanosarcinales;Methanosarcinaceae;Methanolobus;Methanolobus psychrophilus;Methanolobus psychrophilus R15	E.Methanomicrobia	1.19	0.866793	#N/A
Methanomassiliicoccus_Mx1_Issoire_uid207287	1295009	Euryarchaeota;Methanomicrobia;unclassified Methanomicrobia;Methanomassiliicoccus;Candidatus Methanomassiliicoccus intestinalis;Candidatus Methanomassiliicoccus intestinalis Issoire-Mx1	E.Thermoplasmata	2.08	0.83315	#N/A
Methanomethylovorans_hollandica_DSM_15978_uid184864	867904	Euryarchaeota;Methanomicrobia;Methanosarcinales;Methanosarcinaceae;Methanomethylovorans;Methanomethylovorans hollandica;Methanomethylovorans hollandica DSM 15978	E.Methanomicrobia	1.3	0.906886	#N/A
Methanoplanus_petrolearius_DSM_11571_uid52695	679926	Euryarchaeota;Methanomicrobia;Methanomicrobiales;Methanomicrobiaceae;Methanoplanus;Methanoplanus petrolearius;Methanoplanus petrolearius DSM 11571	E.Methanomicrobia	1.79	0.912747	0.87325
Methanopyrus_kandleri_AV19_uid57883	190192	Euryarchaeota;Methanopyri;Methanopyrales;Methanopyraceae;Methanopyrus;Methanopyrus kandleri;Methanopyrus kandleri AV19	E.Methanobacteria	2.14	0.797866	0.775934
Methanoregula_boonei_6A8_uid58815	456442	Euryarchaeota;Methanomicrobia;Methanomicrobiales;Methanoregulaceae;Methanoregula;Methanoregula boonei;Methanoregula boonei 6A8	E.Methanomicrobia	1.25	0.931105	#N/A
Methanoregula_formicicum_SMSP_uid184406	593750	Euryarchaeota;Methanomicrobia;Methanomicrobiales;Methanoregulaceae;Methanoregula;Methanoregula formicica;Methanoregula formicica SMSP	E.Methanomicrobia	1.26	0.916193	#N/A
Methanosaeta_concilii_GP6_uid66207	990316	Euryarchaeota;Methanomicrobia;Methanosarcinales;Methanosaetaceae;Methanosaeta;Methanosaeta concilii;Methanosaeta concilii GP6	E.Methanomicrobia	2.01	0.90705	0.842511
Methanosaeta_harundinacea_6Ac_uid81199	1110509	Euryarchaeota;Methanomicrobia;Methanosarcinales;Methanosaetaceae;Methanosaeta;Methanosaeta harundinacea;Methanosaeta harundinacea 6Ac	E.Methanomicrobia	1.55	0.935497	#N/A
Methanosaeta_thermophila_PT_uid58469	349307	Euryarchaeota;Methanomicrobia;Methanosarcinales;Methanosaetaceae;Methanosaeta;Methanosaeta thermophila;Methanosaeta thermophila PT	E.Methanomicrobia	1.7	0.972288	0.911557
Methanosalsum_zhilinae_DSM_4017_uid68249	679901	Euryarchaeota;Methanomicrobia;Methanosarcinales;Methanosarcinaceae;Methanosalsum;Methanosalsum zhilinae;Methanosalsum zhilinae DSM 4017	E.Methanomicrobia	1.29	0.959008	0.934211
Methanosarcina_acetivorans_C2A_uid57879	188937	Euryarchaeota;Methanomicrobia;Methanosarcinales;Methanosarcinaceae;Methanosarcina;Methanosarcina acetivorans;Methanosarcina acetivorans C2A	E.Methanomicrobia	0.47	0.889011	0.86765
Methanosarcina_barkeri_Fusaro_uid57715	269797	Euryarchaeota;Methanomicrobia;Methanosarcinales;Methanosarcinaceae;Methanosarcina;Methanosarcina barkeri;Methanosarcina barkeri str. Fusaro	E.Methanomicrobia	0.688	0.95669	0.950883
Methanosarcina_mazei_Go1_uid57893	192952	Euryarchaeota;Methanomicrobia;Methanosarcinales;Methanosarcinaceae;Methanosarcina;Methanosarcina mazei;Methanosarcina mazei Go1	E.Methanomicrobia	0.0159	0.964667	0.950134
Methanosarcina_mazei_Tuc01_uid190185	1236903	Euryarchaeota;Methanomicrobia;Methanosarcinales;Methanosarcinaceae;Methanosarcina;Methanosarcina mazei;Methanosarcina mazei Tuc01	E.Methanomicrobia	0.996	0.842348	#N/A
Methanosphaera_stadtmanae_DSM_3091_uid58407	339860	Euryarchaeota;Methanobacteria;Methanobacteriales;Methanobacteriaceae;Methanosphaera;Methanosphaera stadtmanae;Methanosphaera stadtmanae DSM 3091	E.Methanobacteria	2.04	0.903646	0.888021
Methanosphaerula_palustris_E1_9c_uid59193	521011	Euryarchaeota;Methanomicrobia;Methanomicrobiales;Methanoregulaceae;Methanosphaerula;Methanosphaerula palustris;Methanosphaerula palustris E1-9c	E.Methanomicrobia	1.49	0.903955	0.884746
Methanospirillum_hungatei_JF_1_uid58181	323259	Euryarchaeota;Methanomicrobia;Methanomicrobiales;Methanospirillaceae;Methanospirillum;Methanospirillum hungatei;Methanospirillum hungatei JF-1	E.Methanomicrobia	1.95	0.906769	0.884701
Methanothermobacter_marburgensis_Marburg_uid51637	79929	Euryarchaeota;Methanobacteria;Methanobacteriales;Methanobacteriaceae;Methanothermobacter;Methanothermobacter marburgensis;Methanothermobacter marburgensis str. Marburg	E.Methanobacteria	0.401	0.977234	0.948207
Methanothermobacter_thermautotrophicus_Delta_H_uid57877	187420	Euryarchaeota;Methanobacteria;Methanobacteriales;Methanobacteriaceae;Methanothermobacter;Methanothermobacter thermautotrophicus;Methanothermobacter thermautotrophicus str. Delta H	E.Methanobacteria	0.585	0.962627	0.930593
Methanothermococcus_okinawensis_IH1_uid51535	647113	Euryarchaeota;Methanococci;Methanococcales;Methanococcaceae;Methanothermococcus;Methanothermococcus okinawensis;Methanothermococcus okinawensis IH1	E.Methanococci	0.667	0.965539	0.943574
Methanothermus_fervidus_DSM_2088_uid60167	523846	Euryarchaeota;Methanobacteria;Methanobacteriales;Methanothermaceae;Methanothermus;Methanothermus fervidus;Methanothermus fervidus DSM 2088	E.Methanobacteria	1.13	0.974279	0.968823
Methanotorris_igneus_Kol_5_uid67321	880724	Euryarchaeota;Methanococci;Methanococcales;Methanocaldococcaceae;Methanotorris;Methanotorris igneus;Methanotorris igneus Kol 5	E.Methanococci	0.517	0.963903	0.948081
nanoarchaeote_Nst1	1294122	Nanoarchaeota;unclassified Nanoarchaeota;nanoarchaeote Nst1	Nanoarchaeota	2.13	0.736682	#N/A
Nanoarchaeum_equitans_Kin4_M_uid58009	228908	Nanoarchaeota;Nanoarchaeum;Nanoarchaeum equitans;Nanoarchaeum equitans Kin4-M	Nanoarchaeota	2.13	0.753223	0.740809
Natrialba_magadii_ATCC_43099_uid46245	547559	Euryarchaeota;Halobacteria;Halobacteriales;Halobacteriaceae;Natrialba;Natrialba magadii;Natrialba magadii ATCC 43099	E.Halobacteria	0.474	0.917854	0.864672
Natrinema_J7_uid171337	406552	Euryarchaeota;Halobacteria;Halobacteriales;Halobacteriaceae;Natrinema;Natrinema sp. J7-2	E.Halobacteria	0.528	0.832171	#N/A
Natrinema_pellirubrum_DSM_15624_uid74437	797303	Euryarchaeota;Halobacteria;Halobacteriales;Halobacteriaceae;Natrinema;Natrinema pellirubrum;Natrinema pellirubrum DSM 15624	E.Halobacteria	0.406	0.957133	#N/A
Natronobacterium_gregoryi_SP2_uid74439	797304	Euryarchaeota;Halobacteria;Halobacteriales;Halobacteriaceae;Natronobacterium;Natronobacterium gregoryi;Natronobacterium gregoryi SP2	E.Halobacteria	0.615	0.932987	#N/A
Natronococcus_occultus_SP4_uid184863	694430	Euryarchaeota;Halobacteria;Halobacteriales;Halobacteriaceae;Natronococcus;Natronococcus occultus;Natronococcus occultus SP4	E.Halobacteria	0.448	0.949446	#N/A
Natronomonas_moolapensis_8_8_11_uid190182	268739	Euryarchaeota;Halobacteria;Halobacteriales;Halobacteriaceae;Natronomonas;Natronomonas moolapensis;Natronomonas moolapensis 8.8.11	E.Halobacteria	1.09	0.962896	#N/A
Natronomonas_pharaonis_DSM_2160_uid58435	348780	Euryarchaeota;Halobacteria;Halobacteriales;Halobacteriaceae;Natronomonas;Natronomonas pharaonis;Natronomonas pharaonis DSM 2160	E.Halobacteria	0.814	0.934043	0.906738
Nitrosoarchaeum_koreensis_MY1_MY1	1001994	Thaumarchaeota;Nitrosopumilales;Nitrosopumilaceae;Candidatus Nitrosoarchaeum;Candidatus Nitrosoarchaeum limnia;Candidatus Nitrosoarchaeum limnia SFB1	Thaumarchaeota	1.03	0.929599	0.85406
Nitrosoarchaeum_limnia_SFB1	886738	Thaumarchaeota;Nitrosopumilales;Nitrosopumilaceae;Candidatus Nitrosoarchaeum;Candidatus Nitrosoarchaeum koreensis;Candidatus Nitrosoarchaeum koreensis MY1	Thaumarchaeota	1.03	0.923604	0.857982
Nitrosopumilus_maritimus_SCM1_uid58903	436308	Thaumarchaeota;Nitrosopumilales;Nitrosopumilaceae;Nitrosopumilus;Nitrosopumilus maritimus;Nitrosopumilus maritimus SCM1	Thaumarchaeota	0.681	0.971063	0.915415
Picrophilus_torridus_DSM_9790_uid58041	263820	Euryarchaeota;Thermoplasmata;Thermoplasmatales;Picrophilaceae;Picrophilus;Picrophilus torridus;Picrophilus torridus DSM 9790	E.Thermoplasmata	1.85	0.951267	0.940182
Pyrobaculum_1860_uid82379	1104324	Crenarchaeota;Thermoprotei;Thermoproteales;Thermoproteaceae;Pyrobaculum;Pyrobaculum sp. 1860	C.Thermoprotei	0.799	0.908319	#N/A
Pyrobaculum_aerophilum_IM2_uid57727	178306	Crenarchaeota;Thermoprotei;Thermoproteales;Thermoproteaceae;Pyrobaculum;Pyrobaculum aerophilum;Pyrobaculum aerophilum str. IM2	C.Thermoprotei	0.631	0.920537	0.893748
Pyrobaculum_arsenaticum_DSM_13514_uid58409	340102	Crenarchaeota;Thermoprotei;Thermoproteales;Thermoproteaceae;Pyrobaculum;Pyrobaculum arsenaticum;Pyrobaculum arsenaticum DSM 13514	C.Thermoprotei	0.504	0.987386	0.957373
Pyrobaculum_calidifontis_JCM_11548_uid58787	410359	Crenarchaeota;Thermoprotei;Thermoproteales;Thermoproteaceae;Pyrobaculum;Pyrobaculum calidifontis;Pyrobaculum calidifontis JCM 11548	C.Thermoprotei	0.662	0.973023	0.964219
Pyrobaculum_islandicum_DSM_4184_uid58635	384616	Crenarchaeota;Thermoprotei;Thermoproteales;Thermoproteaceae;Pyrobaculum;Pyrobaculum islandicum;Pyrobaculum islandicum DSM 4184	C.Thermoprotei	0.832	0.976239	0.971689
Pyrobaculum_neutrophilum_V24Sta_uid58421	444157	Crenarchaeota;Thermoprotei;Thermoproteales;Thermoproteaceae;Pyrobaculum;Pyrobaculum neutrophilum;Pyrobaculum neutrophilum V24Sta	C.Thermoprotei	0.86	0.980163	#N/A
Pyrobaculum_oguniense_TE7_uid84411	698757	Crenarchaeota;Thermoprotei;Thermoproteales;Thermoproteaceae;Pyrobaculum;Pyrobaculum oguniense;Pyrobaculum oguniense TE7	C.Thermoprotei	0.439	0.924868	#N/A
Pyrococcus_abyssi_GE5_uid62903	272844	Euryarchaeota;Thermococci;Thermococcales;Thermococcaceae;Pyrococcus;Pyrococcus abyssi;Pyrococcus abyssi GE5	E.Thermococci	0.232	0.993841	0.988812
Pyrococcus_furiosus_COM1_uid169620	1185654	Euryarchaeota;Thermococci;Thermococcales;Thermococcaceae;Pyrococcus;Pyrococcus furiosus;Pyrococcus furiosus COM1	E.Thermococci	0.16	0.992248	#N/A
Pyrococcus_furiosus_DSM_3638_uid57873	186497	Euryarchaeota;Thermococci;Thermococcales;Thermococcaceae;Pyrococcus;Pyrococcus furiosus;Pyrococcus furiosus DSM 3638	E.Thermococci	0.15	0.985862	0.944
Pyrococcus_horikoshii_OT3_uid57753	70601	Euryarchaeota;Thermococci;Thermococcales;Thermococcaceae;Pyrococcus;Pyrococcus horikoshii;Pyrococcus horikoshii OT3	E.Thermococci	0.348	0.941568	0.930364
Pyrococcus_NA2_uid66551	342949	Euryarchaeota;Thermococci;Thermococcales;Thermococcaceae;Pyrococcus;Pyrococcus sp. NA2	E.Thermococci	0.358	0.974229	0.954545
Pyrococcus_ST04_uid167261	1183377	Euryarchaeota;Thermococci;Thermococcales;Thermococcaceae;Pyrococcus;Pyrococcus sp. ST04	E.Thermococci	0.271	0.996569	#N/A
Pyrococcus_yayanosii_CH1_uid68281	529709	Euryarchaeota;Thermococci;Thermococcales;Thermococcaceae;Pyrococcus;Pyrococcus yayanosii;Pyrococcus yayanosii CH1	E.Thermococci	0.293	0.956032	0.932976
Pyrolobus_fumarii_1A_uid73415	694429	Crenarchaeota;Thermoprotei;Desulfurococcales;Pyrodictiaceae;Pyrolobus;Pyrolobus fumarii;Pyrolobus fumarii 1A	C.Desulfurococci	1.18	0.842988	0.811896
Salinarchaeum_laminariae_Harcht_Bsk1_uid207001	1333523	Euryarchaeota;Halobacteria;Halobacteriales;Halobacteriaceae;Salinarchaeum;Salinarchaeum sp. Harcht-Bsk1	E.Halobacteria	1.31	0.940259	#N/A
Staphylothermus_hellenicus_DSM_12710_uid45893	591019	Crenarchaeota;Thermoprotei;Desulfurococcales;Desulfurococcaceae;Staphylothermus;Staphylothermus hellenicus;Staphylothermus hellenicus DSM 12710	C.Desulfurococci	0.731	0.95122	0.878049
Staphylothermus_marinus_F1_uid58719	399550	Crenarchaeota;Thermoprotei;Desulfurococcales;Desulfurococcaceae;Staphylothermus;Staphylothermus marinus;Staphylothermus marinus F1	C.Desulfurococci	0.567	0.977128	0.905972
Sulfolobus_acidocaldarius_DSM_639_uid58379	330779	Crenarchaeota;Thermoprotei;Sulfolobales;Sulfolobaceae;Sulfolobus;Sulfolobus acidocaldarius;Sulfolobus acidocaldarius DSM 639	C.Sulfolobi	0.219	0.995953	0.958633
Sulfolobus_acidocaldarius_N8_uid189027	1028566	Crenarchaeota;Thermoprotei;Sulfolobales;Sulfolobaceae;Sulfolobus;Sulfolobus acidocaldarius;Sulfolobus acidocaldarius N8	C.Sulfolobi	0.128	0.995604	#N/A
Sulfolobus_acidocaldarius_Ron12_I_uid189028	1028567	Crenarchaeota;Thermoprotei;Sulfolobales;Sulfolobaceae;Sulfolobus;Sulfolobus acidocaldarius;Sulfolobus acidocaldarius Ron12/I	C.Sulfolobi	0.128	0.995684	#N/A
Sulfolobus_acidocaldarius_SUSAZ_uid232254	1435377	Crenarchaeota;Thermoprotei;Sulfolobales;Sulfolobaceae;Sulfolobus;Sulfolobus acidocaldarius;Sulfolobus acidocaldarius SUSAZ	C.Sulfolobi	1.34	0.973439	#N/A
Sulfolobus_islandicus_HVE10_4_uid162067	930943	Crenarchaeota;Thermoprotei;Sulfolobales;Sulfolobaceae;Sulfolobus;Sulfolobus islandicus;Sulfolobus islandicus HVE10/4	C.Sulfolobi	0.0456	0.99375	#N/A
Sulfolobus_islandicus_L_D_8_5_uid43679	425944	Crenarchaeota;Thermoprotei;Sulfolobales;Sulfolobaceae;Sulfolobus;Sulfolobus islandicus;Sulfolobus islandicus L.D.8.5	C.Sulfolobi	0.0754	0.970149	0.946065
Sulfolobus_islandicus_L_S_2_15_uid58871	429572	Crenarchaeota;Thermoprotei;Sulfolobales;Sulfolobaceae;Sulfolobus;Sulfolobus islandicus;Sulfolobus islandicus L.S.2.15	C.Sulfolobi	0.111	0.993793	0.987956
Sulfolobus_islandicus_LAL14_1_uid197216	1241935	Crenarchaeota;Thermoprotei;Sulfolobales;Sulfolobaceae;Sulfolobus;Sulfolobus islandicus;Sulfolobus islandicus LAL14/1	C.Sulfolobi	0.0802	0.980008	#N/A
Sulfolobus_islandicus_M_14_25_uid58849	427317	Crenarchaeota;Thermoprotei;Sulfolobales;Sulfolobaceae;Sulfolobus;Sulfolobus islandicus;Sulfolobus islandicus M.14.25	C.Sulfolobi	0.115	0.995784	0.993484
Sulfolobus_islandicus_M_16_27_uid58851	427318	Crenarchaeota;Thermoprotei;Sulfolobales;Sulfolobaceae;Sulfolobus;Sulfolobus islandicus;Sulfolobus islandicus M.16.27	C.Sulfolobi	0.0462	0.994355	0.99172
Sulfolobus_islandicus_M_16_4_uid58841	426118	Crenarchaeota;Thermoprotei;Sulfolobales;Sulfolobaceae;Sulfolobus;Sulfolobus islandicus;Sulfolobus islandicus M.16.4	C.Sulfolobi	0.0387	0.987569	0.980987
Sulfolobus_islandicus_REY15A_uid162071	930945	Crenarchaeota;Thermoprotei;Sulfolobales;Sulfolobaceae;Sulfolobus;Sulfolobus islandicus;Sulfolobus islandicus REY15A	C.Sulfolobi	0.0802	0.994327	#N/A
Sulfolobus_islandicus_Y_G_57_14_uid58923	439386	Crenarchaeota;Thermoprotei;Sulfolobales;Sulfolobaceae;Sulfolobus;Sulfolobus islandicus;Sulfolobus islandicus Y.G.57.14	C.Sulfolobi	0.0917	0.992419	0.977265
Sulfolobus_islandicus_Y_N_15_51_uid58825	419942	Crenarchaeota;Thermoprotei;Sulfolobales;Sulfolobaceae;Sulfolobus;Sulfolobus islandicus;Sulfolobus islandicus Y.N.15.51	C.Sulfolobi	0.304	0.984138	0.968621
Sulfolobus_solfataricus_98_2_uid167998	555311	Crenarchaeota;Thermoprotei;Sulfolobales;Sulfolobaceae;Sulfolobus;Sulfolobus solfataricus;Sulfolobus solfataricus 98/2	C.Sulfolobi	0.348	0.979843	#N/A
Sulfolobus_solfataricus_P2_uid57721	273057	Crenarchaeota;Thermoprotei;Sulfolobales;Sulfolobaceae;Sulfolobus;Sulfolobus solfataricus;Sulfolobus solfataricus P2	C.Sulfolobi	0.284	0.988247	0.979181
Sulfolobus_tokodaii_7_uid57807	273063	Crenarchaeota;Thermoprotei;Sulfolobales;Sulfolobaceae;Sulfolobus;Sulfolobus tokodaii;Sulfolobus tokodaii str. 7	C.Sulfolobi	1.11	0.92324	0.913336
Thermococcus_4557_uid70841	1042877	Euryarchaeota;Thermococci;Thermococcales;Thermococcaceae;Thermococcus;Thermococcus sp. 4557	E.Thermococci	0.517	0.962963	0.931552
Thermococcus_AM4_uid54735	246969	Euryarchaeota;Thermococci;Thermococcales;Thermococcaceae;Thermococcus;Thermococcus sp. AM4	E.Thermococci	0.319	0.969847	0.936544
Thermococcus_barophilus_MP_uid54733	391623	Euryarchaeota;Thermococci;Thermococcales;Thermococcaceae;Thermococcus;Thermococcus barophilus;Thermococcus barophilus MP	E.Thermococci	0.378	0.943046	0.922296
Thermococcus_CL1_uid168259	163003	Euryarchaeota;Thermococci;Thermococcales;Thermococcaceae;Thermococcus;Thermococcus sp. CL1	E.Thermococci	0.221	0.975223	#N/A
Thermococcus_gammatolerans_EJ3_uid59389	593117	Euryarchaeota;Thermococci;Thermococcales;Thermococcaceae;Thermococcus;Thermococcus gammatolerans;Thermococcus gammatolerans EJ3	E.Thermococci	0.285	0.980983	0.951763
Thermococcus_kodakarensis_KOD1_uid58225	69014	Euryarchaeota;Thermococci;Thermococcales;Thermococcaceae;Thermococcus;Thermococcus kodakarensis;Thermococcus kodakarensis KOD1	E.Thermococci	0.41	0.948829	0.929315
Thermococcus_litoralis_DSM_5473_uid82997	523849	Euryarchaeota;Thermococci;Thermococcales;Thermococcaceae;Thermococcus;Thermococcus litoralis;Thermococcus litoralis DSM 5473	E.Thermococci	0.18	0.920938	#N/A
Thermococcus_onnurineus_NA1_uid59043	523850	Euryarchaeota;Thermococci;Thermococcales;Thermococcaceae;Thermococcus;Thermococcus onnurineus;Thermococcus onnurineus NA1	E.Thermococci	0.34	0.978734	0.955949
Thermococcus_sibiricus_MM_739_uid59399	604354	Euryarchaeota;Thermococci;Thermococcales;Thermococcaceae;Thermococcus;Thermococcus sibiricus;Thermococcus sibiricus MM 739	E.Thermococci	1.14	0.936149	0.904715
Thermofilum_1910b_uid215374	1365176	Crenarchaeota;Thermoprotei;Thermoproteales;Thermofilaceae;Thermofilum;Thermofilum sp. 1910b	C.Thermoprotei	1.64	0.880589	#N/A
Thermofilum_pendens_Hrk_5_uid58563	368408	Crenarchaeota;Thermoprotei;Thermoproteales;Thermofilaceae;Thermofilum;Thermofilum pendens;Thermofilum pendens Hrk 5	C.Thermoprotei	1.56	0.898296	0.842918
Thermogladius_1633_uid167488	1184251	Crenarchaeota;Thermoprotei;Desulfurococcales;Desulfurococcaceae;Thermogladius;Thermogladius cellulolyticus;Thermogladius cellulolyticus 1633	C.Desulfurococci	1.56	0.948337	#N/A
Thermoplasma_acidophilum_DSM_1728_uid61573	273075	Euryarchaeota;Thermoplasmata;Thermoplasmatales;Thermoplasmataceae;Thermoplasma;Thermoplasma acidophilum;Thermoplasma acidophilum DSM 1728	E.Thermoplasmata	1.54	0.97037	0.966981
Thermoplasma_volcanium_GSS1_uid57751	273116	Euryarchaeota;Thermoplasmata;Thermoplasmatales;Thermoplasmataceae;Thermoplasma;Thermoplasma volcanium;Thermoplasma volcanium GSS1	E.Thermoplasmata	1.76	0.977364	0.970686
Thermoplasmatales_archaeon_BRNA1_uid195930	1054217	Euryarchaeota;Thermoplasmata;Thermoplasmatales;unclassified Thermoplasmatales;Thermoplasmatales archaeon BRNA1	E.Thermoplasmata	2.02	0.831365	#N/A
Thermoproteus_tenax_Kra_1_uid74443	768679	Crenarchaeota;Thermoprotei;Thermoproteales;Thermoproteaceae;Thermoproteus;Thermoproteus tenax;Thermoproteus tenax Kra 1	C.Thermoprotei	1.33	0.969253	0.953262
Thermoproteus_uzoniensis_768_20_uid65089	999630	Crenarchaeota;Thermoprotei;Thermoproteales;Thermoproteaceae;Thermoproteus;Thermoproteus uzoniensis;Thermoproteus uzoniensis 768-20	C.Thermoprotei	1.08	0.961116	0.935499
Thermosphaera_aggregans_DSM_11486_uid48993	633148	Crenarchaeota;Thermoprotei;Desulfurococcales;Desulfurococcaceae;Thermosphaera;Thermosphaera aggregans;Thermosphaera aggregans DSM 11486	C.Desulfurococci	1.42	0.953136	0.932949
Vulcanisaeta_distributa_DSM_14429_uid52827	572478	Crenarchaeota;Thermoprotei;Thermoproteales;Thermoproteaceae;Vulcanisaeta;Vulcanisaeta distributa;Vulcanisaeta distributa DSM 14429	C.Thermoprotei	0.629	0.948255	0.860008
Vulcanisaeta_moutnovskia_768_28_uid63631	985053	Crenarchaeota;Thermoprotei;Thermoproteales;Thermoproteaceae;Vulcanisaeta;Vulcanisaeta moutnovskia;Vulcanisaeta moutnovskia 768-28	C.Thermoprotei	1.58	0.981051	0.886305
