# Supplementary material for: Archaeal Clusters of Orthologous Genes (arCOGs): An Update and Application for Analysis of Shared Features between Thermococcales, Methanococcales, and Methanobacteriales
Source: Life (Basel). 2015 Mar 10;5(1):818–40. doi: 10.3390/life5010818 (PMC4390880; doi:10.3390/life5010818)
Supplement: Supplementary File 1 [file life-05-00818-s001.zip › Table S2.xls]

## Sheet: S2
Supplementary Table S2 Results of phylogenetic analysis of 219 core arCOGs and estimation of support for alternative Thermococci topologies (see Figure 2)
Topology I:	the sum of affinities of Thermococci to Methanobacteria and Methanococci <2/3 AND the number of sister Euryarchaeota lineages with affinities of at least 0.5/6 >3 AND the number of sister non-Euryarchaeota lineages with affinities of at least 0.5/12 <3
Topology II:	the sum of affinities of Thermococci to Methanobacteria and Methanococci >2/3
	sister clade(s) score of E.Thermococci to:													supported
arCOG	C.Desulfurococci	C.Sulfolobi	C.Thermoprotei	E.Archaeoglobi	E.Halobacteria	E.Methanobacteria	E.Methanococci	E.Methanomicrobia	E.Thermococci	E.Thermoplasmata	Korarchaeota	Nanoarchaeota	Thaumarchaeota	topology	category	gene	annotation
arCOG00982	0	0	0	0	0.26	0.219	0	0.26		0.26	0	0	0	topo-I	C	GldA	Glycerol dehydrogenase or related enzyme
arCOG04101	0	0	0	0.187	0.187	0.187	0.187	0.187		0.067	0	0	0	topo-I	C	NtpD	Archaeal/vacuolar-type H+-ATPase subunit D
arCOG01909	0	0.361	0.361	0.107	0.04	0.058	0	0.072		0	0	0	0	topo-I	E	GlnA	Glutamine synthetase
arCOG00081	0	0	0	0.352	0	0.296	0.352	0		0	0	0	0	topo-I	F	PyrF	Orotidine-5'-phosphate decarboxylase
arCOG00911	0	0	0	0.182	0.182	0.182	0.182	0.182		0.09	0	0	0	topo-I	F	PyrB	Aspartate carbamoyltransferase, catalytic chain
arCOG04229	0	0	0	0	0.2	0.2	0.2	0.2		0.2	0	0	0	topo-I	F	PyrI	Aspartate carbamoyltransferase, regulatory subunit
arCOG00972	0	0	0	0.154	0.154	0.154	0.154	0.154		0.154	0	0	0.075	topo-I	H	NadR	Nicotinamide mononucleotide adenylyltransferase
arCOG01348	0	0	0	0	0	0.296	0.352	0.352		0	0	0	0	topo-I	H	nadF	NAD kinase
arCOG04260	0	0	0	0	0.239	0.239	0.239	0.199		0.085	0	0	0	topo-I	I	HMG1	Hydroxymethylglutaryl-CoA reductase
arCOG00405	0	0	0	0.167	0.167	0.167	0.167	0.167		0.167	0	0	0	topo-I	J	GRS1	Glycyl-tRNA synthetase (class II)
arCOG00406	0	0	0	0.213	0.183	0.179	0.213	0.213		0	0	0	0	topo-I	J	AsnS	Aspartyl/asparaginyl-tRNA synthetase
arCOG00780	0	0	0	0.167	0.167	0.167	0.167	0.167		0.167	0	0	0	topo-I	J	RPL18A	Ribosomal protein L18E
arCOG00781	0	0	0	0.167	0.167	0.167	0.167	0.167		0.167	0	0	0	topo-I	J	RPL32	Ribosomal protein L32E
arCOG00985	0	0	0	0.202	0.202	0.17	0.202	0.123		0.1	0	0	0	topo-I	J	Tma20	Predicted RNA-binding protein, contains PUA domain
arCOG01179	0	0	0	0.2	0	0.2	0.2	0.2		0.2	0	0	0	topo-I	J	InfA	Translation initiation factor 1 (IF-1)
arCOG01255	0	0	0	0.258	0.258	0	0	0.227		0.258	0	0	0	topo-I	J	AlaS	Alanyl-tRNA synthetase
arCOG01358	0	0	0	0	0	0.265	0.315	0.106		0	0	0	0.315	topo-I	J	MiaB	2-methylthioadenine synthetase
arCOG01559	0	0	0	0.167	0.167	0.167	0.167	0.167		0.167	0	0	0	topo-I	J	FusA	Translation elongation factor G, EF-G (GTPase)
arCOG01561	0	0	0	0.167	0.167	0.167	0.167	0.167		0.167	0	0	0	topo-I	J	TEF1	Translation elongation factor EF-1 alpha, GTPase
arCOG01719	0	0	0	0.182	0.182	0.182	0.182	0.182		0.09	0	0	0	topo-I	J	GatE	Archaeal Glu-tRNAGln amidotransferase subunit E (contains GAD domain)
arCOG01751	0	0	0	0	0.352	0.296	0	0.352		0	0	0	0	topo-I	J	Rpl7Ae	Ribosomal protein L7AE
arCOG01758	0	0	0	0.167	0.167	0.167	0.167	0.167		0.167	0	0	0	topo-I	J	RpsJ	Ribosomal protein S10
arCOG01988	0	0	0	0	0.289	0.243	0.289	0.18		0	0	0	0	topo-I	J	EFB1	Translation elongation factor EF-1beta
arCOG04086	0	0	0	0.222	0.222	0.222	0	0.222		0.11	0	0	0	topo-I	J	RpmD	Ribosomal protein L30
arCOG04087	0	0	0	0.167	0.167	0.167	0.167	0.167		0.167	0	0	0	topo-I	J	RpsE	Ribosomal protein S5
arCOG04097	0	0	0	0.167	0.167	0.167	0.167	0.167		0.167	0	0	0	topo-I	J	RpsC	Ribosomal protein S3
arCOG04150	0	0	0	0	0.463	0.074	0	0.463		0	0	0	0	topo-I	J	Krr1	rRNA processing protein Krr1/Pno1, contains KH domain
arCOG04154	0	0	0	0.167	0.167	0.167	0.167	0.167		0.167	0	0	0	topo-I	J	RPS8A	Ribosomal protein S8E
arCOG04209	0	0	0	0.167	0.167	0.167	0.167	0.167		0.167	0	0	0	topo-I	J	RPL15A	Ribosomal protein L15E
arCOG04240	0	0	0	0.2	0.2	0	0.2	0.2		0.2	0	0	0	topo-I	J	RpsK	Ribosomal protein S11
arCOG04473	0	0	0	0.167	0.167	0.167	0.167	0.167		0.167	0	0	0	topo-I	J	RPL31A	Ribosomal protein L31E
arCOG01762	0	0	0	0.2	0.2	0	0.2	0.2		0.2	0	0	0	topo-I	K	RpoB/Rpo2	DNA-directed RNA polymerase subunit B
arCOG01920	0	0	0	0.24	0.24	0.038	0	0.24		0.24	0	0	0	topo-I	K	NusG	Transcription antiterminator NusG
arCOG01981	0	0	0	0.207	0	0.174	0.207	0.207		0.207	0	0	0	topo-I	K	SUA7	Transcription initiation factor TFIIB, Brf1 subunit/Transcription initiation factor TFIIB
arCOG04061	0	0	0	0.2	0.2	0.2	0.2	0.2		0	0	0	0	topo-I	K	EGD2	Transcription factor homologous to NACalpha-BTF3
arCOG04257	0	0	0	0.171	0.171	0.144	0.171	0.171		0.171	0	0	0	topo-I	K	RpoC/Rpo3	DNA-directed RNA polymerase subunit A'
arCOG00397	0	0	0	0.164	0	0.071	0.047	0.024		0.122	0	0.449	0.124	topo-I	L	SbcD	DNA repair exonuclease, SbcD
arCOG00415	0	0	0	0.25	0.25	0	0	0.25		0.25	0	0	0	topo-I	L	RecA	RecA/RadA recombinase
arCOG00459	0	0	0	0.148	0.148	0.148	0.148	0.111		0.148	0	0	0.148	topo-I	L	Nth	EndoIII-related endonuclease
arCOG00470	0	0	0	0.167	0.167	0.167	0.167	0.167		0.167	0	0	0	topo-I	L	HolB	ATPase involved in DNA replication HolB, large subunit
arCOG00488	0	0	0	0.167	0.167	0.167	0.167	0.167		0.167	0	0	0	topo-I	L	DnaN	DNA polymerase sliding clamp subunit (PCNA homolog)
arCOG01347	0	0	0	0.351	0.351	0	0	0.298		0	0	0	0	topo-I	L	CDC9	ATP-dependent DNA ligase
arCOG01369	0.047	0	0	0.189	0.164	0.159	0	0.277		0.162	0	0	0	topo-I	M	WcaG	Nucleoside-diphosphate-sugar epimerase
arCOG00970	0	0.171	0	0.171	0	0.144	0.171	0.171		0.171	0	0	0	topo-I	O	PRE1	20S proteasome, beta subunit
arCOG00543	0	0	0	0.171	0.171	0.144	0.171	0.171		0.171	0	0	0	topo-I	R	-	Predicted metal-dependent RNase, consists of a metallo-beta-lactamase domain and an RNA-binding KH domain
arCOG01227	0	0	0	0	0	0.296	0.352	0		0.352	0	0	0	topo-I	U	FtsY	Signal recognition particle GTPase
arCOG04169	0	0	0	0.167	0.167	0.167	0.167	0.167		0.167	0	0	0	topo-I	U	SecY	Preprotein translocase subunit SecY
arCOG00865	0	0	0	0	0	0.445	0.445	0.05		0.061	0	0	0	topo-II	C	NtpB	Archaeal/vacuolar-type H+-ATPase subunit B
arCOG00868	0	0	0	0	0	0.457	0.543	0		0	0	0	0	topo-II	C	NtpA	Archaeal/vacuolar-type H+-ATPase subunit A
arCOG00869	0	0	0	0	0	0.943	0	0.057		0	0	0	0	topo-II	C	NtpE	Archaeal/vacuolar-type H+-ATPase subunit E
arCOG04138	0	0	0	0	0	0.445	0.445	0.05		0.061	0	0	0	topo-II	C	NtpI	Archaeal/vacuolar-type H+-ATPase subunit I
arCOG00087	0	0	0	0	0	0.137	0.863	0		0	0	0	0	topo-II	F	GuaA	GMP synthase - Glutamine amidotransferase domain
arCOG00689	0	0	0	0	0	1	0	0		0	0	0	0	topo-II	F	AllB	Dihydroorotase or related cyclic amidohydrolase
arCOG00858	0	0	0	0	0	0.137	0.863	0		0	0	0	0	topo-II	F	PyrH	Uridylate kinase
arCOG01037	0	0	0	0	0	0.137	0.863	0		0	0	0	0	topo-II	F	Cmk	Cytidylate kinase
arCOG01038	0	0	0	0	0	0	1	0		0	0	0	0	topo-II	F	Fap7	Broad-specificity NMP kinase
arCOG00767	0	0	0	0	0.192	0.523	0.284	0		0	0	0	0	topo-II	G	{ManB}	Phosphomannomutase
arCOG01111	0	0	0	0	0	0.5	0.5	0		0	0	0	0	topo-II	G	PpsA	Phosphoenolpyruvate synthase/pyruvate phosphate dikinase
arCOG01122	0	0	0	0	0	1	0	0		0	0	0	0	topo-II	G	RpiA	Ribose 5-phosphate isomerase
arCOG00638	0	0	0	0.151	0	0	0.849	0		0	0	0	0	topo-II	H	ThiL	Thiamine monophosphate kinase
arCOG01726	0	0	0	0	0	0	1	0		0	0	0	0	topo-II	H	IspA	Geranylgeranyl pyrophosphate synthase
arCOG04137	0	0	0	0	0	1	0	0		0	0	0	0	topo-II	H	SAM1	S-adenosylhomocysteine hydrolase
arCOG00109	0	0	0	0	0	0	1	0		0	0	0	0	topo-II	J	HemK	Methylase of polypeptide chain release factors
arCOG00779	0	0	0	0	0	0.5	0.5	0		0	0	0	0	topo-II	J	RplO	Ribosomal protein L15
arCOG00784	0	0	0.113	0	0	0.443	0.443	0		0	0	0	0	topo-II	J	POP4	RNase P/RNase MRP subunit p29
arCOG00807	0	0	0	0	0	0	1	0		0	0	0	0	topo-II	J	IleS	Isoleucyl-tRNA synthetase
arCOG01001	0	0	0	0	0	1	0	0		0	0	0	0	topo-II	J	Map	Methionine aminopeptidase
arCOG01015	0	0	0	0	0	0	1	0		0	0	0	0	topo-II	J	Pus10	tRNA U54 and U55 pseudouridine synthase Pus10
arCOG01183	0	0	0	0	0	0.333	0.333	0		0.333	0	0	0	topo-II	J	Kae1p/TsaD	Subunit of KEOPS complex, tRNA A37 threonylcarbamoyltransferase, contains a domain with ASKHA fold and RIO-type kinase (AP-endonuclease activity)
arCOG01563	0	0	0	0	0	0	1	0		0	0	0	0	topo-II	J	GCD11	Translation initiation factor 2, gamma subunit eIF-2 gamma, GTPase
arCOG01640	0	0	0	0	0	0	1	0		0	0	0	0	topo-II	J	GCD7	Translation initiation factor 2, beta subunit (eIF-2beta)/eIF-5 N-terminal domain
arCOG01695	0	0	0	0	0	0	1	0		0	0	0	0	topo-II	J	-	Predicted component of the ribosome quality control (RQC) complex, YloA/Tae2 family, contains fibronectin-binding (FbpA) and DUF814 domains
arCOG01701	0	0	0	0	0	0	1	0		0	0	0	0	topo-II	J	SEN2	tRNA splicing endonuclease
arCOG01722	0	0	0	0	0	0.457	0.543	0		0	0	0	0	topo-II	J	RpsM	Ribosomal protein S13
arCOG01736	0	0	0	0	0	0.457	0.543	0		0	0	0	0	topo-II	J	LigT	2'-5' RNA ligase
arCOG01741	0	0	0	0	0	0.457	0.543	0		0	0	0	0	topo-II	J	PelA	Release factor eRF1
arCOG04049	0	0	0	0	0	0.5	0.5	0		0	0	0	0	topo-II	J	RPL40A	Ribosomal protein L40E
arCOG04071	0	0	0	0	0	1	0	0		0	0	0	0	topo-II	J	RplD	Ribosomal protein L4
arCOG04090	0	0	0	0	0	0	1	0		0	0	0	0	topo-II	J	RplF	Ribosomal protein L6P
arCOG04091	0	0	0	0	0	0	1	0		0	0	0	0	topo-II	J	RpsH	Ribosomal protein S8
arCOG04093	0	0	0	0	0	0.137	0.863	0		0	0	0	0	topo-II	J	RPS4A	Ribosomal protein S4E
arCOG04094	0	0	0	0	0	1	0	0		0	0	0	0	topo-II	J	RplX	Ribosomal protein L24
arCOG04096	0	0	0	0	0	1	0	0		0	0	0	0	topo-II	J	RpsQ	Ribosomal protein S17
arCOG04107	0	0	0	0	0	0	1	0		0	0	0	0	topo-II	J	SUI2	Translation initiation factor 2, alpha subunit (eIF-2alpha)
arCOG04108	0	0	0	0	0	0	1	0		0	0	0	0	topo-II	J	RPS27A	Ribosomal protein S27E
arCOG04109	0	0	0	0	0	0.5	0.5	0		0	0	0	0	topo-II	J	RPL42A	Ribosomal protein L44E
arCOG04113	0	0	0	0	0	0	1	0		0	0	0	0	topo-II	J	RplP	Ribosomal protein L10AE/L16
arCOG04129	0	0	0	0	0	0	1	0		0	0	0	0	topo-II	J	RPL21A	Ribosomal protein L21E
arCOG04130	0	0	0	0	0	1	0	0		0	0	0	0	topo-II	J	-	Predicted RNA-binding protein
arCOG04131	0	0	0	0	0	1	0	0		0	0	0	0	topo-II	J	RsmA	16S rRNA A1518 and A1519 N6-dimethyltransferase RsmA/KsgA/DIM1
arCOG04182	0	0	0	0	0	1	0	0		0	0	0	0	topo-II	J	RPS24A	Ribosomal protein S24E
arCOG04187	0	0	0	0	0	0	1	0		0	0	0	0	topo-II	J	Sdo1	Ribosome maturation protein Sdo1
arCOG04208	0	0	0	0	0	1	0	0		0	0	0	0	topo-II	J	RPL43A	Ribosomal protein L37AE/L43A
arCOG04239	0	0	0	0	0	0	1	0		0	0	0	0	topo-II	J	RpsD	Ribosomal protein S4 or related protein
arCOG04243	0	0	0	0	0	0	1	0		0	0	0	0	topo-II	J	RpsI	Ribosomal protein S9
arCOG04277	0	0	0	0	0	1	0	0		0	0	0	0	topo-II	J	Efp	Translation elongation factor P (EF-P)/translation initiation factor 5A (eIF-5A)
arCOG04288	0	0	0	0	0	0	1	0		0	0	0	0	topo-II	J	RplJ	Ribosomal protein L10
arCOG04312	0	0	0	0	0	1	0	0		0	0	0	0	topo-II	J	Fcf1	rRNA-processing protein FCF1, contains PIN domain
arCOG00675	0	0	0	0	0	0	1	0		0	0	0	0	topo-II	K	RPB7	DNA-directed RNA polymerase, subunit E'/Rpb7
arCOG01016	0	0	0	0	0	0	1	0		0	0	0	0	topo-II	K	Rpo4	DNA-directed RNA polymerase, subunit Rpo4/RpoF
arCOG00469	0	0	0	0	0	1	0	0		0	0	0	0	topo-II	L	HolB	ATPase involved in DNA replication HolB, small subunit
arCOG00551	0	0	0	0	0	1	0	0		0	0	0	0	topo-II	L	-	DNA replication initiation complex subunit, GINS15 family
arCOG00553	0	0	0	0	0	0	1	0		0	0	0	0	topo-II	L	BRR2	Replicative superfamily II helicase
arCOG03013	0	0	0	0	0	1	0	0		0	0	0	0	topo-II	L	PRI2	Eukaryotic-type DNA primase, large subunit
arCOG04110	0	0	0	0	0	1	0	0		0	0	0	0	topo-II	L	PRI1	Eukaryotic-type DNA primase, catalytic (small) subunit
arCOG04281	0	0	0	0	0	0	1	0		0	0	0	0	topo-II	L	DnaG	DNA primase (bacterial type)
arCOG00971	0	0	0	0	0	1	0	0		0	0	0	0	topo-II	O	PRE1	20S proteasome, alpha subunit
arCOG00980	0	0	0	0	0	1	0	0		0	0	0	0	topo-II	O	SlpA	FKBP-type peptidyl-prolyl cis-trans isomerase 2
arCOG01257	0	0	0	0	0	0.5	0.5	0		0	0	0	0	topo-II	O	GroEL	Chaperonin GroEL, HSP60 family
arCOG01341	0	0	0	0	0	1	0	0		0	0	0	0	topo-II	O	GIM5	Predicted prefoldin, molecular chaperone implicated in de novo protein folding
arCOG04142	0	0	0	0	0	0	1	0		0	0	0	0	topo-II	O	DYS1	Deoxyhypusine synthase
arCOG04055	0	0	0	0	0	0.457	0.543	0		0	0	0	0	topo-II	R	-	SHS2 domain protein implicated in nucleic acid metabolism
arCOG04303	0	0	0	0	0	0.457	0.543	0		0	0	0	0	topo-II	R	-	Uncharacterized Rossmann fold enzyme
arCOG04269	0	0	0	0	0	0	1	0		0	0	0	0	topo-II	S	-	Protein, predicted to be involved in DNA repair
arCOG01180	0	0	0	0	0	0	1	0		0	0	0	0	topo-II	T	RIO1	Serine/threonine protein kinase involved in cell cycle control
arCOG01228	0	0	0	0	0	0.457	0.543	0		0	0	0	0	topo-II	U	Ffh	Signal recognition particle GTPase
arCOG00570	0	0	0	0	0	0.457	0	0		0	0.543	0	0	neither	C	FixC	Dehydrogenase (flavoprotein)
arCOG01340	0.154	0	0.048	0.042	0	0	0	0.028		0.111	0.455	0	0.162	neither	C	-	Acyl-CoA synthetase (NDP forming)
arCOG01543	0.092	0.181	0.181	0.181	0.012	0	0	0.1		0.074	0.181	0	0	neither	C	NuoI	NADH dehydrogenase subunit I
arCOG00585	0.297	0	0.061	0	0	0	0.564	0		0.078	0	0	0	neither	D	Mrp	Mrp family protein, ATPase, contains iron-sulfur cluster
arCOG00912	0.221	0	0	0	0	0	0	0		0	0.779	0	0	neither	E	ArgF	Ornithine carbamoyltransferase
arCOG01000	0.091	0.091	0.091	0.091	0.091	0.091	0.091	0.091		0.091	0.091	0	0.091	neither	E	PepP	Xaa-Pro aminopeptidase
arCOG01434	0.098	0.081	0.1	0.081	0.083	0.081	0.081	0.058		0.101	0.156	0	0.081	neither	E	ThrC	Threonine synthase and cysteate synthase
arCOG01700	0	0	0	0	0	0	0.5	0		0	0	0.5	0	neither	E	SpeB	Arginase family enzyme
arCOG01924	0.083	0.083	0.083	0.083	0.083	0.083	0.083	0.083		0.083	0.083	0.083	0.083	neither	E	AnsB	L-asparaginase/archaeal Glu-tRNAGln amidotransferase subunit D
arCOG00018	0	0	0	0	0	0	0	0		1	0	0	0	neither	F	Nnr2	NAD(P)H-hydrate repair enzyme Nnr, NAD(P)H-hydrate dehydratase domain
arCOG00063	0	0	0	0	0	0	0	0		1	0	0	0	neither	F	PyrG	CTP synthase (UTP-ammonia lyase)
arCOG00067	0	0	0	0	0	0	0	0		1	0	0	0	neither	F	PrsA	Phosphoribosylpyrophosphate synthetase
arCOG01891	0.28	0	0	0.643	0	0	0	0.077		0	0	0	0	neither	F	Tmk	Thymidylate kinase
arCOG04184	0	0	0	0.316	0	0	0	0.053		0.316	0.316	0	0	neither	F	RdgB	Inosine/xanthosine triphosphate pyrophosphatase, all-alpha NTP-PPase family
arCOG00014	0.017	0.128	0.08	0.209	0.144	0.232	0	0.019		0.028	0	0	0.144	neither	G	RbsK	Sugar kinase, ribokinase family
arCOG00493	0	0	0	1	0	0	0	0		0	0	0	0	neither	G	GapA	Glyceraldehyde-3-phosphate dehydrogenase/erythrose-4-phosphate dehydrogenase
arCOG00496	0	0	0	0	0	0	0	0		1	0	0	0	neither	G	Pgk	3-phosphoglycerate kinase
arCOG01087	0.245	0.245	0.194	0	0	0	0	0		0	0.245	0	0.071	neither	G	TpiA	Triosephosphate isomerase
arCOG01169	0	0	0	0	0	0.215	0	0.785		0	0	0	0	neither	G	Eno	Enolase
arCOG00069	0	0	0	0	0	0.239	0	0		0.761	0	0	0	neither	H	NadE	NH3-dependent NAD+ synthetase
arCOG01904	0	0	0	0	0	0	0	0		0	1	0	0	neither	H	-	CTP-dependent Riboflavin kinase
arCOG01085	0	0	0	0.082	0	0	0.459	0		0	0.459	0	0	neither	I	PcrB	(S)-3-O-geranylgeranylglyceryl phosphate synthase, TIM-barrel fold
arCOG01278	0.233	0.233	0.233	0	0	0	0	0		0	0.233	0	0.068	neither	I	PaaJ	Acetyl-CoA acetyltransferase
arCOG01532	0	0	0	0	0	0	0	0		1	0	0	0	neither	I	UppS	Undecaprenyl pyrophosphate synthase
arCOG01767	0	0	0.14	0	0	0	0	0		0	0.667	0	0.193	neither	I	PksG	3-hydroxy-3-methylglutaryl CoA synthase
arCOG00033	0	0	0	0	0	0.296	0.352	0		0	0	0.352	0	neither	J	Trm5	Wybutosine (yW) biosynthesis enzyme, Trm5 methyltransferase
arCOG00042	0.123	0	0.066	0.22	0	0.026	0.097	0		0	0	0.468	0	neither	J	TilS	tRNA(Ile)-lysidine synthase TilS/MesJ
arCOG00078	0	0	0	0	0	0	0	0		0	0	1	0	neither	J	NOP1	Fibrillarin-like rRNA methylase
arCOG00187	0.14	0.14	0.14	0	0	0.118	0.14	0		0	0.14	0.14	0.041	neither	J	Rli1	Translation initiation factor RLI1, contains Fe-S and AAA+ ATPase domains
arCOG00357	0	0	0	0	0	0	0	0		1	0	0	0	neither	J	GTP1	Ribosome-binding ATPase YchF, GTP1/OBG family
arCOG00358	0.224	0.224	0.224	0	0	0.04	0	0		0	0.224	0	0.065	neither	J	DRG	Ribosome-interacting GTPase 1
arCOG00401	0	0	0	0	0	0	0	0		0.162	0	0	0.838	neither	J	ThrS	Threonyl-tRNA synthetase
arCOG00402	0	0	0	0	0	0	0	0		1	0	0	0	neither	J	ProS	Prolyl-tRNA synthetase
arCOG00403	0.151	0.17	0.17	0.17	0	0	0	0		0	0.17	0.17	0	neither	J	SerS	Seryl-tRNA synthetase
arCOG00404	0.098	0.163	0	0.163	0	0.163	0.163	0.144		0.058	0	0	0.047	neither	J	HisS	Histidyl-tRNA synthetase
arCOG00410	0	0	0	0	0	0	0	0		0	0	1	0	neither	J	PheS	Phenylalanyl-tRNA synthetase alpha subunit
arCOG00412	0	0	0	0	0	0	0	0		0	0	1	0	neither	J	PheT	Phenylalanyl-tRNA synthetase beta subunit
arCOG00487	0	0	0	0	0	0	0	0		0	0	0.333	0.667	neither	J	ArgS	Arginyl-tRNA synthetase
arCOG00501	0	0	0	0	0	0	0	0		1	0	0	0	neither	J	Rnz	Ribonuclease Z, beta-lactamase superfamily hydrolase
arCOG00782	0.143	0.143	0.143	0	0	0	0.143	0		0	0.143	0.143	0.143	neither	J	RpsN	Ribosomal protein S14
arCOG00785	0.136	0.192	0.192	0.192	0	0	0	0		0	0.192	0.096	0	neither	J	RpmC	Ribosomal protein L29
arCOG00808	0	0.667	0	0	0	0	0	0		0	0	0.333	0	neither	J	ValS	Valyl-tRNA synthetase
arCOG00810	0	0	0	0	0	0	0	0		1	0	0	0	neither	J	MetG	Methionyl-tRNA synthetase
arCOG00978	0.162	0.162	0.162	0	0	0.026	0	0		0.162	0.162	0	0.162	neither	J	GCD14	tRNA(1-methyladenosine) methyltransferase
arCOG00989	0.077	0.085	0.085	0.085	0.085	0.072	0.085	0.085		0.085	0.085	0.085	0.085	neither	J	Tgt	Queuine/archaeosine tRNA-ribosyltransferase
arCOG01185	0.225	0.225	0.225	0	0	0.036	0	0		0	0	0.225	0.065	neither	J	Bud32	tRNA A-37 threonylcarbamoyl transferase component Bud32
arCOG01219	0	0	0	0	0	0	0	0		1	0	0	0	neither	J	TRM1	N2,N2-dimethylguanosine tRNA methyltransferase
arCOG01344	0	0	0	1	0	0	0	0		0	0	0	0	neither	J	RPS19A	Ribosomal protein S19E (S16A)
arCOG01742	0	0	0	0	0	0	0	0		0	0	1	0	neither	J	eRF1	Peptide chain release factor eRF1
arCOG01885	0	0	0	0	0	0.311	0.311	0		0	0	0.156	0.221	neither	J	RPS17A	Ribosomal protein S17E
arCOG01886	0.073	0	0.161	0	0	0	0	0		0	0	0.766	0	neither	J	TyrS	Tyrosyl-tRNA synthetase
arCOG01887	0	0	0	0	0	0	0	0		0	1	0	0	neither	J	TrpS	Tryptophanyl-tRNA synthetase
arCOG01923	0.24	0.24	0.24	0	0	0.038	0	0		0	0	0	0.24	neither	J	SIK1	RNA processing factor Prp31, contains Nop domain
arCOG01946	0.27	0.27	0.27	0	0	0	0	0		0	0	0	0.191	neither	J	RPS6A	Ribosomal protein S6E/S10
arCOG01950	0	0	0	0	0.667	0	0	0		0	0	0.333	0	neither	J	RPL24A	Ribosomal protein L24E
arCOG01952	0.176	0.276	0.276	0	0	0	0	0.087		0.14	0	0	0.045	neither	J	SUA5	tRNA A37 threonylcarbamoyladenosine synthetase subunit TsaC/SUA5/YrdC
arCOG04067	0	0	0	0	0	0	0	0		0	0	1	0	neither	J	RplB	Ribosomal protein L2
arCOG04070	0.167	0.167	0.167	0	0	0	0	0		0	0.167	0.167	0.167	neither	J	RplC	Ribosomal protein L3
arCOG04072	0	0	0	0	0	0	0.437	0		0	0.437	0	0.127	neither	J	RplW	Ribosomal protein L23
arCOG04088	0	0	0	0	0	0	0.5	0		0	0	0.5	0	neither	J	RplR	Ribosomal protein L18
arCOG04089	0	0	0	0	0	0	0	0		0	0	1	0	neither	J	RPL19A	Ribosomal protein L19E
arCOG04092	0.463	0	0	0	0	0.074	0	0		0	0.463	0	0	neither	J	RplE	Ribosomal protein L5
arCOG04095	0	0	0	0	0	0	0	0		0	0	1	0	neither	J	RplN	Ribosomal protein L14
arCOG04098	0	0	0	0	0	0	0	0		0	1	0	0	neither	J	RplV	Ribosomal protein L22
arCOG04099	0.167	0.167	0.167	0	0	0.167	0.167	0		0	0	0	0.167	neither	J	RpsS	Ribosomal protein S19
arCOG04126	0	0	0	0	0	0	0	0		0	0	1	0	neither	J	RPL37A	Ribosomal protein L37E
arCOG04176	0.167	0.167	0.167	0	0	0	0	0		0	0.167	0.167	0.167	neither	J	TIF6	Translation initiation factor 6 (eIF-6)
arCOG04185	0.167	0.167	0.167	0	0	0.167	0	0		0	0.167	0	0.167	neither	J	RpsO	Ribosomal protein S15P
arCOG04186	0.24	0.24	0.24	0	0	0.038	0	0		0	0	0	0.24	neither	J	RPS1A	Ribosomal protein S3AE
arCOG04223	0	0	0	0	0	0	0	0		1	0	0	0	neither	J	SUI1	Translation initiation factor 1 (eIF-1/SUI1)
arCOG04228	0.713	0	0.287	0	0	0	0	0		0	0	0	0	neither	J	Pth2	Peptidyl-tRNA hydrolase
arCOG04242	0	0	0	0	0.5	0	0	0.5		0	0	0	0	neither	J	RplM	Ribosomal protein L13
arCOG04245	0	0	0	0	0	0	0.5	0		0	0	0.5	0	neither	J	RpsB	Ribosomal protein S2
arCOG04246	0	0	0	0	0	0	0	0		0	1	0	0	neither	J	RtcB	RNA 3'-P ligase, RtcB family protein
arCOG04249	0	0	0	0	0	0.137	0	0		0	0.863	0	0	neither	J	CCA1	tRNA nucleotidyltransferase (CCA-adding enzyme)
arCOG04254	0	0	0	0	0	0	0	0		0	0	1	0	neither	J	RpsG	Ribosomal protein S7
arCOG04255	0.159	0.159	0.159	0	0	0	0.159	0		0	0.159	0.159	0.046	neither	J	RpsL	Ribosomal protein S12
arCOG04287	0	0	0	1	0	0	0	0		0	0	0	0	neither	J	RPP1A	Ribosomal protein L12E/L44/L45/RPP1/RPP2
arCOG04289	0	0	0	0	0	0	0	0		0	0	1	0	neither	J	RplA	Ribosomal protein L1
arCOG04302	0.167	0.167	0.167	0	0	0	0	0		0	0.167	0.167	0.167	neither	J	GlnS	Glutamyl- or glutaminyl-tRNA synthetase
arCOG04314	0	0	0	0	0	0	0	0		0	0	1	0	neither	J	RPS28A	Ribosomal protein S28E/S33
arCOG04372	0	0	0	1	0	0	0	0		0	0	0	0	neither	J	RplK	Ribosomal protein L11
arCOG00579	0.099	0	0.901	0	0	0	0	0		0	0	0	0	neither	K	RPB9	DNA-directed RNA polymerase, subunit M/Transcription elongation factor TFIIS
arCOG01268	0	0	0	0	0	0	0	0		1	0	0	0	neither	K	Rpo6/RpoZ	DNA-directed RNA polymerase subunit K/omega
arCOG01580	0.1	0.238	0.025	0.194	0.018	0.119	0	0		0.06	0.189	0	0.056	neither	K	-	DNA-binding transcriptional regulator, Lrp family
arCOG01760	0	0	0	0.863	0	0.137	0	0		0	0	0	0	neither	K	NusA	Transcription elongation factor
arCOG04111	0	0	0.26	0	0	0.041	0	0		0.26	0.26	0	0.178	neither	K	RPB11	DNA-directed RNA polymerase, subunit L
arCOG04241	0	0	0	0	1	0	0	0		0	0	0	0	neither	K	RpoA/Rpo1	DNA-directed RNA polymerase subunit D
arCOG04258	0	0	0	0	0	0	0	0		0	0.559	0.279	0.162	neither	K	RPB5	DNA-directed RNA polymerase, subunit H, RpoH/RPB5
arCOG04341	0.068	0	0	0.776	0	0.123	0	0.032		0	0	0	0	neither	K	RPC12	DNA-directed RNA polymerase, subunit RPC12/RpoP (contains C4-type Zn-finger)
arCOG00280	0.159	0.173	0	0.063	0	0.126	0.173	0		0	0.173	0	0.134	neither	L	-	HerA helicase
arCOG00368	0.109	0.183	0	0.067	0	0.125	0.179	0		0.119	0.183	0	0.036	neither	L	SbcC	ATPase involved in DNA repair, SbcC
arCOG04050	0	0	0	0	0	0	0	0		0	1	0	0	neither	L	FEN1	5'-3' exonuclease
arCOG04121	0.098	0.098	0.098	0.098	0	0.098	0.098	0.053		0.063	0.098	0.098	0.098	neither	L	RnhB	Ribonuclease HII
arCOG01222	0.091	0.091	0.091	0.091	0.091	0.091	0.091	0.091		0.091	0.091	0	0.091	neither	M	TagD	Cytidylyltransferase fused to conserved domain of DUF357 family
arCOG01308	0	0	0	0	0	0	0	0		0	0	1	0	neither	O	Cdc48	ATPase of the AAA+ class , CDC48 family
arCOG01342	0	0	0	1	0	0	0	0		0	0	0	0	neither	O	GimC	Prefoldin, chaperonin cofactor
arCOG04236	0.144	0.162	0.162	0	0.162	0.026	0.051	0.012		0.119	0	0	0.162	neither	O	SufC	Cysteine desulfurase activator ATPase
arCOG00606	0.139	0.056	0.014	0.062	0.032	0.172	0.202	0.095		0.075	0.119	0	0.034	neither	R	-	CBS domain
arCOG04179	0.1	0.1	0.1	0.1	0.1	0.1	0.1	0.1		0.1	0	0	0.1	neither	R	PDCD5	DNA-binding TFAR19-related protein, PDSD5 family
arCOG04076	0	0	0	0	0	0	0	0		1	0	0	0	neither	S	-	Uncharacterized protein, DUF359 family
arCOG01217	0.071	0	0	0	0.807	0	0	0		0.122	0	0	0	neither	U	SEC65	Signal recognition particle 19 kDa protein
arCOG04430	0	0	0	0	0	0	0	0		1	0	0	0	neither	R	-	HD superfamily phosphohydrolase
