# Supplementary material for: Archaeal Clusters of Orthologous Genes (arCOGs): An Update and Application for Analysis of Shared Features between Thermococcales, Methanococcales, and Methanobacteriales
Source: Life (Basel). 2015 Mar 10;5(1):818–40. doi: 10.3390/life5010818 (PMC4390880; doi:10.3390/life5010818)
Supplement: Supplementary File 1 [file life-05-00818-s001.zip › Table S3.xlsx]

## Sheet: patt_clades
Supplementary Table S3. Shared arCOGs for Thermococci and other lineages or combination of lineages estimated using exclusivity ratio
arCOG	Functional Group	Gene name	Annotation	Exclusivity ratio for the lineage combinations indicated in brackets, only arCOGs with ratios >10 shown (see Methods for details)	exclusivity ratio bins: 10-100 (bin1) 101-1000 (bin2) other up bin3 (for Figure 3B)	Lineages
				R[E.Methanobacteria,E.Thermococci]		C.Desulfurococci	C.Sulfolobi	C.Thermoprotei	E.Archaeoglobi	E.Halobacteria	E.Methanobacteria	E.Methanococci	E.Methanomicrobia	E.Thermococci	E.Thermoplasmata	Korarchaeota	Nanoarchaeota	Thaumarchaeota
arCOG03821	N	-	Secreted protein, component of type IV pili like system	10000	3	0	0	0	0	0	1	0	0	1	0	0	0	0
arCOG05786	N	-	Membrane protein, associated with type IV pili like system	5552	3	0	0	0	0	0	0.5552	0	0	1	0	0	0	0
arCOG01230	Q	-	Cyclic 2, 3-diphosphoglycerate synthetase	10000	3	0	0	0	0	0	1	0	0	1	0	0	0	0
arCOG05854	S	-	Uncharacterized protein	6896	3	0	0	0	0	0	0.6896	0	0	1	0	0	0	0
arCOG10654	S	-	Uncharacterized protein	787	2	0	0	0	0	0	0.0787	0	0	0.3279	0	0	0	0
arCOG12754	V	-	CRISPR-Cas system subtype I-B-variant associated protein, predicted small subunit	434	2	0	0	0	0	0	0.0434	0	0	0.0569	0	0	0	0
arCOG12755	V	-	CRISPR-Cas system subtype I-B-variant associated protein, predicted large subunit	434	2	0	0	0	0	0	0.0434	0	0	0.0569	0	0	0	0
arCOG00383	J	-	TOPRIM domain containing protein, potential RNase M5, involed in 5S rRNA maturation	26.11	1	0	0	0	0	0.0325	0.8485	0	0	1	0	0	0	0
arCOG				R[E.Methanobacteria,E.Methanococci,E.Thermococci]		C.Desulfurococci	C.Sulfolobi	C.Thermoprotei	E.Archaeoglobi	E.Halobacteria	E.Methanobacteria	E.Methanococci	E.Methanomicrobia	E.Thermococci	E.Thermoplasmata	Korarchaeota	Nanoarchaeota	Thaumarchaeota
arCOG00045	J	-	PP-loop ATPase fused to N-terminal RNA binding KH-domain (some lacking KH domain)	10000	3	0	0	0	0	0	1	1	0	1	0	0	0	0
arCOG00044	J	TilS	tRNA(Ile)-lysidine synthase TilS/MesJ	1589	3	0	0	0	0	0	0.1589	1	0	0.7965	0	0	0	0
arCOG00388	M	LytB	Putative cell wall-binding domain	1515	3	0	0	0	0	0	0.1515	1	0	0.8759	0	0	0	0
arCOG02300	N	EppA/PulO	Type II secretory pathway, prepilin signal peptidase PulO	10000	3	0	0	0	0	0	1	1	0	1	0	0	0	0
arCOG01819	N	CpaF	Pilus assembly protein, ATPase of CpaF family	9679	3	0	0	0	0	0	1	1	0	0.9679	0	0	0	0
arCOG03421	N	-	Predicted component of type IV pili like system	9477	3	0	0	0	0	0	1	1	0	0.9477	0	0	0	0
arCOG05114	R	-	HAD family hydrolase related enzyme	1589	3	0	0	0	0	0	0.1589	0.8161	0	0.6765	0	0	0	0
arCOG03198	S	-	Uncharacterized protein with N-terminal Zn finger	8411	3	0	0	0	0	0	0.8411	1	0	1	0	0	0	0
arCOG00058	M	AgaS	Glucosamine 6-Phosphate Deaminase	583	2	0	0	0	0	0	1	0.0583	0	0.3374	0	0	0	0
arCOG03351	K	-	DNA-binding protein containing C-terminal HTH domain of resolvase type	29.1	1	0	0	0.0289	0	0	0.8411	1	0	1	0	0	0	0
arCOG05092	S	-	Uncharacterized membrane protein	10.38	1	0	0	0	0	0.0693	0.8411	0.8377	0	1	0	0	0	0.0807
arCOG				R[E.Methanococci,E.Thermococci]		C.Desulfurococci	C.Sulfolobi	C.Thermoprotei	E.Archaeoglobi	E.Halobacteria	E.Methanobacteria	E.Methanococci	E.Methanomicrobia	E.Thermococci	E.Thermoplasmata	Korarchaeota	Nanoarchaeota	Thaumarchaeota
arCOG09747	D	-	Snf7 family protein	2295	3	0	0	0	0	0	0	0.2295	0	0.307	0	0	0	0
arCOG09749	D	-	Snf7 family protein	2295	3	0	0	0	0	0	0	0.2295	0	0.307	0	0	0	0
arCOG01170	G	Eno	Enolase	10000	3	0	0	0	0	0	0	1	0	1	0	0	0	0
arCOG00046	J	TilS	tRNA(Ile)-lysidine synthase TilS/MesJ	10000	3	0	0	0	0	0	0	1	0	1	0	0	0	0
arCOG00111	Q	-	SAM-dependent methyltransferase	9417	3	0	0	0	0	0	0	0.9417	0	1	0	0	0	0
arCOG03407	R	-	AAA+ superfamily ATPase	1674	3	0	0	0	0	0	0	0.3868	0	0.1674	0	0	0	0
arCOG03415	S	-	Uncharacterized protein, DUF2666 family	10000	3	0	0	0	0	0	0	1	0	1	0	0	0	0
arCOG04823	S	-	Uncharacterized protein	10000	3	0	0	0	0	0	0	1	0	1	0	0	0	0
arCOG05831	S	-	Uncharacterized membrane protein	3790	3	0	0	0	0	0	0	0.5213	0	0.379	0	0	0	0
arCOG05115	S	-	Uncharacterized protein	2806	3	0	0	0	0	0	0	0.2806	0	0.8326	0	0	0	0
arCOG05084	S	-	Uncharacterized protein	2533	3	0	0	0	0	0	0	0.2533	0	0.6114	0	0	0	0
arCOG08274	S	-	Uncharacterized protein	2533	3	0	0	0	0	0	0	0.2533	0	0.2563	0	0	0	0
arCOG09530	S	-	Uncharacterized protein	2237	3	0	0	0	0	0	0	0.3427	0	0.2237	0	0	0	0
arCOG05772	S	-	Uncharacterized protein	1335	3	0	0	0	0	0	0	0.1335	0	0.8784	0	0	0	0
arCOG10680	S	-	Uncharacterized protein	1053	3	0	0	0	0	0	0	0.1471	0	0.1053	0	0	0	0
arCOG09832	V	-	RelB family antitoxin	1051	3	0	0	0	0	0	0	0.1051	0	0.2094	0	0	0	0
arCOG05103	X	-	Uncharacterized plasmid-associated protein	3345	3	0	0	0	0	0	0	0.408	0	0.3345	0	0	0	0
arCOG05104	X	-	HerA-like helicase	3345	3	0	0	0	0	0	0	0.408	0	0.3345	0	0	0	0
arCOG05105	X	-	Uncharacterized plasmid-associated protein	3345	3	0	0	0	0	0	0	0.408	0	0.3345	0	0	0	0
arCOG05106	X	-	Uncharacterized plasmid-associated membrane protein	3345	3	0	0	0	0	0	0	0.408	0	0.3345	0	0	0	0
arCOG05107	X	-	Uncharacterized plasmid-associated membrane protein with two beta-stranded extracellular domains	3345	3	0	0	0	0	0	0	0.4511	0	0.3345	0	0	0	0
arCOG06635	X	-	Uncharacterized plasmid-associated membrane protein, contains PEGA domain	3345	3	0	0	0	0	0	0	0.4511	0	0.3345	0	0	0	0
arCOG07167	X	-	Uncharacterized plasmid-associated membrane protein	3345	3	0	0	0	0	0	0	0.408	0	0.3345	0	0	0	0
arCOG06578	X	XerC	XerD/XerC family integrase	1053	3	0	0	0	0	0	0	0.3858	0	0.1053	0	0	0	0
arCOG06585	L	-	PD-(DE)xK superfamily endonuclease	732	2	0	0	0	0	0	0	0.08	0	0.0732	0	0	0	0
arCOG08297	S	-	Uncharacterized protein	923	2	0	0	0	0	0	0	0.2533	0	0.0923	0	0	0	0
arCOG08298	S	-	Uncharacterized protein	923	2	0	0	0	0	0	0	0.2533	0	0.0923	0	0	0	0
arCOG09561	S	-	Uncharacterized protein	732	2	0	0	0	0	0	0	0.1702	0	0.0732	0	0	0	0
arCOG09679	S	-	Uncharacterized conserved protein	675	2	0	0	0	0	0	0	0.1689	0	0.0675	0	0	0	0
arCOG07105	S	-	Uncharacterized protein	662	2	0	0	0	0	0	0	0.0662	0	0.213	0	0	0	0
arCOG07116	S	-	Uncharacterized protein	662	2	0	0	0	0	0	0	0.0662	0	0.1769	0	0	0	0
arCOG09677	S	-	Uncharacterized protein	569	2	0	0	0	0	0	0	0.1106	0	0.0569	0	0	0	0
arCOG12906	S	-	Uncharacterized protein	553	2	0	0	0	0	0	0	0.1702	0	0.0553	0	0	0	0
arCOG05060	S	-	Uncharacterized protein	444	2	0	0	0	0	0	0	0.0444	0	0.4727	0	0	0	0
arCOG07627	S	-	Uncharacterized protein	444	2	0	0	0	0	0	0	0.0444	0	0.6159	0	0	0	0
arCOG12719	S	-	Uncharacterized protein	395	2	0	0	0	0	0	0	0.0444	0	0.0395	0	0	0	0
arCOG05770	S	-	Uncharacterized membrane protein	377	2	0	0	0	0	0	0	0.0377	0	0.5719	0	0	0	0
arCOG05847	S	-	Uncharacterized membrane protein	227	2	0	0	0	0	0	0	0.0227	0	1	0	0	0	0
arCOG13419	S	-	Uncharacterized protein	227	2	0	0	0	0	0	0	0.0227	0	0.1126	0	0	0	0
arCOG05095	S	-	Uncharacterized protein	218	2	0	0	0	0	0	0	0.0218	0	0.9679	0	0	0	0
arCOG09750	V	-	RelB family antitoxin	662	2	0	0	0	0	0	0	0.0662	0	0.1078	0	0	0	0
arCOG03171	V	-	AAA+ superfamily ATPase fused to HTH and RecB nuclease domains	218	2	0	0	0	0	0	0	0.0218	0	0.2829	0	0	0	0
arCOG11296	X	-	Transcriptional regulator, ArsR family; plasmid associated	662	2	0	0	0	0	0	0	0.0662	0	0.0675	0	0	0	0
arCOG09649	X	-	Predicted phage protein	639	2	0	0	0	0	0	0	0.1346	0	0.0639	0	0	0	0
arCOG07168	X	-	Uncharacterized plasmid-associated membrane protein	603	2	0	0	0	0	0	0	0.0603	0	0.3345	0	0	0	0
arCOG09648	X	-	Predicted phage protein	484	2	0	0	0	0	0	0	0.0594	0	0.0484	0	0	0	0
arCOG				R[E.Halobacteria,E.Thermococci]		C.Desulfurococci	C.Sulfolobi	C.Thermoprotei	E.Archaeoglobi	E.Halobacteria	E.Methanobacteria	E.Methanococci	E.Methanomicrobia	E.Thermococci	E.Thermoplasmata	Korarchaeota	Nanoarchaeota	Thaumarchaeota
arCOG13681	C	TctC	Tripartite tricarboxylate transporter family, periplasmic component	321	2	0	0	0	0	0.0866	0	0	0	0.0321	0	0	0	0
arCOG05829	K	-	Transcriptional regulator, contains HTH domain	274	2	0	0	0	0	0.0274	0	0	0	1	0	0	0	0
arCOG05750	R	-	Metal-dependent membrane protease, CAAX family	5200	3	0	0	0	0	0.52	0	0	0	1	0	0	0	0
arCOG04590	R	-	Predicted membrane-bound metal-dependent hydrolase	3045	3	0	0	0	0	0.8923	0	0	0	0.3045	0	0	0	0
arCOG00126	R	-	Predicted amidohydrolase	1428	3	0	0	0	0	0.1428	0	0	0	0.6307	0	0	0	0
arCOG10722	R	TctB	Tripartite tricarboxylate transporter component, TctB family	321	2	0	0	0	0	0.158	0	0	0	0.0321	0	0	0	0
arCOG09140	S	-	Uncharacterized protein	2035	3	0	0	0	0	0.2822	0	0	0	0.2035	0	0	0	0
arCOG07133	S	-	Uncharacterized protein	1330	3	0	0	0	0	0.133	0	0	0	0.4448	0	0	0	0
arCOG07974	S	-	Uncharacterized protein	1289	3	0	0	0	0	0.1289	0	0	0	0.1314	0	0	0	0
arCOG09172	S	-	Uncharacterized protein, contains Zn ribbon C-terminal domain	1192	3	0	0	0	0	0.2061	0	0	0	0.1192	0	0	0	0
arCOG05755	S	-	Uncharacterized protein	778	2	0	0	0	0	0.0778	0	0	0	0.9393	0	0	0	0
arCOG13179	S	-	Uncharacterized protein	507	2	0	0	0	0	0.0507	0	0	0	0.0923	0	0	0	0
arCOG06949	S	-	Uncharacterized protein	414	2	0	0	0	0	0.1794	0	0	0	0.0414	0	0	0	0
arCOG05822	S	-	Uncharacterized membrane protein	302	2	0	0	0	0	0.0302	0	0	0	0.6969	0	0	0	0
arCOG08614	S	-	Uncharacterized protein	279	2	0	0	0	0	0.0279	0	0	0	0.6457	0	0	0	0
arCOG05852	S	-	HEAT repeats containing protein	257	2	0	0	0	0	0.0257	0	0	0	0.5973	0	0	0	0
arCOG03786	S	-	Uncharacterized protein, containing C-terminal Zn-ribbon domain	215	2	0	0	0	0	0.0215	0	0	0	1	0	0	0	0
arCOG00450	T	UspA	Nucleotide-binding protein, UspA family	621	2	0	0	0	0	0.8184	0	0	0	0.0621	0	0	0	0
arCOG				R[E.Halobacteria,E.Methanomicrobia,E.Thermococci]		C.Desulfurococci	C.Sulfolobi	C.Thermoprotei	E.Archaeoglobi	E.Halobacteria	E.Methanobacteria	E.Methanococci	E.Methanomicrobia	E.Thermococci	E.Thermoplasmata	Korarchaeota	Nanoarchaeota	Thaumarchaeota
arCOG04791	C	AppB	Cytochrome bd-type quinol oxidase, subunit 2	346	2	0	0	0	0	0.569	0	0	0.0346	0.1078	0	0	0	0
arCOG03311	E	-	Peptidase family C39	571	2	0	0	0	0	0.0571	0	0	0.2362	0.5928	0	0	0	0
arCOG07840	G	-	Glycosyl hydrolase family 18, contains cellulose binding domain	923	2	0	0	0	0	0.1565	0	0	0.0923	0.1285	0	0	0	0
arCOG04923	G	GntT	H+/gluconate symporter or related permease	675	2	0	0	0	0	0.2365	0	0	0.4814	0.0675	0	0	0	0
arCOG02954	G	AmyA	Glycosidase	618	2	0	0	0	0	0.0618	0	0	0.0773	0.4811	0	0	0	0
arCOG00381	K	-	Predicted membrane-associated trancriptional regulator	321	2	0	0	0	0	1	0	0	0.109	0.0321	0	0	0	0
arCOG06399	M	ArnT	Glycosyltransferase of PMT family	321	2	0	0	0	0	0.1318	0	0	0.2171	0.0321	0	0	0	0
arCOG01780	Q	-	SAM-dependent methyltransferase	1559	3	0	0	0	0	0.9569	0	0	0.1559	0.307	0	0	0	0
arCOG03499	R	-	Cell surface protein, contains right handed beta helix region	831	2	0	0	0	0	0.1269	0	0	0.0831	0.3352	0	0	0	0
arCOG06794	R	-	Predicted ATPase	414	2	0	0	0	0	0.0628	0	0	0.1785	0.0414	0	0	0	0
arCOG06339	R	-	Cell surface protein	388	2	0	0	0	0	0.6904	0	0	0.0388	0.0523	0	0	0	0
arCOG07959	R	-	Membrane protein	269	2	0	0	0	0	0.0269	0	0	0.1073	0.1492	0	0	0	0
arCOG08915	S	-	Uncharacterized protein	1783	3	0	0	0	0	0.2004	0	0	0.1783	0.2767	0	0	0	0
arCOG09573	S	-	Uncharacterized protein	530	2	0	0	0	0	0.053	0	0	0.0955	0.3036	0	0	0	0
arCOG03934	S	-	Uncharacterized membrane protein	509	2	0	0	0	0	0.5759	0	0	0.2496	0.0509	0	0	0	0
arCOG06386	S	-	Uncharacterized protein, DUF2892 family	415	2	0	0	0	0	0.8339	0	0	0.0415	0.0675	0	0	0	0
arCOG08981	S	-	Uncharacterized protein	376	2	0	0	0	0	0.114	0	0	0.0376	0.0732	0	0	0	0
arCOG10079	S	-	Uncharacterized protein	269	2	0	0	0	0	0.0269	0	0	0.0415	0.4218	0	0	0	0
arCOG08210	S	-	Uncharacterized protein	205	2	0	0	0	0	0.2203	0	0	0.0205	0.2035	0	0	0	0
arCOG				R[E.Archaeoglobi,E.Thermococci]		C.Desulfurococci	C.Sulfolobi	C.Thermoprotei	E.Archaeoglobi	E.Halobacteria	E.Methanobacteria	E.Methanococci	E.Methanomicrobia	E.Thermococci	E.Thermoplasmata	Korarchaeota	Nanoarchaeota	Thaumarchaeota
arCOG10219	G	ManA	Mannose-6-phosphate isomerase, class I	675	2	0	0	0	0.5245	0	0	0	0	0.0675	0	0	0	0
arCOG02243	K	-	Transcription regulator, contains HTH domain	5245	3	0	0	0	0.5245	0	0	0	0	1	0	0	0	0
arCOG12508	K	-	HTH containing DNA binding protein	621	2	0	0	0	0.1785	0	0	0	0	0.0621	0	0	0	0
arCOG06140	S	-	Uncharacterized protein	4807	3	0	0	0	0.4834	0	0	0	0	0.4807	0	0	0	0
arCOG07117	S	-	Uncharacterized protein, DUF3227 family	3895	3	0	0	0	0.4755	0	0	0	0	0.3895	0	0	0	0
arCOG10064	S	-	Uncharacterized protein	2733	3	0	0	0	0.297	0	0	0	0	0.2733	0	0	0	0
arCOG07118	S	-	Uncharacterized protein	2654	3	0	0	0	0.4755	0	0	0	0	0.2654	0	0	0	0
arCOG06145	S	-	Uncharacterized protein	1864	3	0	0	0	0.1864	0	0	0	0	0.5843	0	0	0	0
arCOG06146	S	-	Uncharacterized protein	1864	3	0	0	0	0.1864	0	0	0	0	0.1976	0	0	0	0
arCOG07090	S	-	Uncharacterized membrane protein	1864	3	0	0	0	0.1864	0	0	0	0	0.5286	0	0	0	0
arCOG07530	S	-	Uncharacterized protein	1864	3	0	0	0	0.1864	0	0	0	0	0.3442	0	0	0	0
arCOG07765	S	-	Uncharacterized protein	1864	3	0	0	0	0.1864	0	0	0	0	0.3763	0	0	0	0
arCOG08621	S	-	Uncharacterized protein	1864	3	0	0	0	0.1864	0	0	0	0	0.2001	0	0	0	0
arCOG08623	S	-	Uncharacterized protein	1864	3	0	0	0	0.1864	0	0	0	0	0.2147	0	0	0	0
arCOG10053	S	-	Uncharacterized protein	1810	3	0	0	0	0.4755	0	0	0	0	0.181	0	0	0	0
arCOG13120	S	-	Uncharacterized protein	1785	3	0	0	0	0.1785	0	0	0	0	0.2035	0	0	0	0
arCOG07839	S	-	Uncharacterized membrane protein	1596	3	0	0	0	0.1596	0	0	0	0	0.2158	0	0	0	0
arCOG14197	S	-	Uncharacterized protein	1317	3	0	0	0	0.297	0	0	0	0	0.1317	0	0	0	0
arCOG10050	S	-	Uncharacterized protein	1241	3	0	0	0	0.1785	0	0	0	0	0.1241	0	0	0	0
arCOG12958	S	-	Uncharacterized protein	1176	3	0	0	0	0.297	0	0	0	0	0.1176	0	0	0	0
arCOG12205	S	-	C2H2 type zinc-finger protein	923	2	0	0	0	0.346	0	0	0	0	0.0923	0	0	0	0
arCOG13980	S	-	Uncharacterized protein	675	2	0	0	0	0.1596	0	0	0	0	0.0675	0	0	0	0
arCOG12219	S	-	Uncharacterized protein	639	2	0	0	0	0.1864	0	0	0	0	0.0639	0	0	0	0
arCOG04457	S	-	Uncharacterized protein	12.08	1	0	0	0	0.3649	0.0302	0	0	0	0.3765	0	0	0	0
arCOG03793	T	-	Inactivated KaiC-like ATPase, DUF835 family	8136	3	0	0	0	0.8136	0	0	0	0	1	0	0	0	0
arCOG03792	T	-	Inactivated KaiC-like ATPase, DUF835 family	3381	3	0	0	0	0.3381	0	0	0	0	1	0	0	0	0
arCOG07102	V	-	PD-(DE)xK superfamily endonuclease	3381	3	0	0	0	0.3381	0	0	0	0	0.3759	0	0	0	0
arCOG10382	V	-	CRISPR-associated protein, Csa5-like small subunit of CASCADE complex	1598	3	0	0	0	0.4834	0	0	0	0	0.1598	0	0	0	0
arCOG10383	V	-	CRISPR-associated protein, predicted large subunit of CASCADE complex	1598	3	0	0	0	0.4834	0	0	0	0	0.1598	0	0	0	0
arCOG11129	V	-	Uncharacterized protein, DUF4258 family; predicted component of toxin-antitoxin system	395	2	0	0	0	0.8136	0	0	0	0	0.0395	0	0	0	0
arCOG				R[E.Thermococci,E.Thermoplasmata]		C.Desulfurococci	C.Sulfolobi	C.Thermoprotei	E.Archaeoglobi	E.Halobacteria	E.Methanobacteria	E.Methanococci	E.Methanomicrobia	E.Thermococci	E.Thermoplasmata	Korarchaeota	Nanoarchaeota	Thaumarchaeota
arCOG07402	D	-	Predicted cell division protein, ESCRT-III/Snf7 family	2141	3	0	0	0	0	0	0	0	0	0.307	0.2141	0	0	0
arCOG10063	E	SdaC	Tryptophan/tyrosine permease family	1378	3	0	0	0	0	0	0	0	0	0.595	0.1378	0	0	0
arCOG00136	G	-	MFS family permease	4291	3	0	0	0	0	0	0	0	0	0.6151	0.4291	0	0	0
arCOG01581	K	-	DNA-binding transcriptional regulator, Lrp family	5054	3	0	0	0	0	0	0	0	0	1	0.5054	0	0	0
arCOG14866	L	-	HhH domain containing DNA-binding domain	321	2	0	0	0	0	0	0	0	0	0.0321	0.0625	0	0	0
arCOG03685	O	-	Predicted redox protein, regulator of disulfide bond formation	7781	3	0	0	0	0	0	0	0	0	1	0.7781	0	0	0
arCOG10427	P	-	Chromate resistance protein	923	2	0	0	0	0	0	0	0	0	0.0923	0.1767	0	0	0
arCOG02317	R	-	Predicted regulator of amino acid metabolism, contains ACT domain	6432	3	0	0	0	0	0	0	0	0	1	0.6432	0	0	0
arCOG10113	S	-	Uncharacterized protein	1378	3	0	0	0	0	0	0	0	0	0.2963	0.1378	0	0	0
arCOG10088	S	-	Uncharacterized protein	1378	3	0	0	0	0	0	0	0	0	0.5325	0.1378	0	0	0
arCOG05805	S	-	Uncharacterized protein	1378	3	0	0	0	0	0	0	0	0	0.9447	0.1378	0	0	0
arCOG05759	S	-	Uncharacterized protein	1378	3	0	0	0	0	0	0	0	0	0.8968	0.1378	0	0	0
arCOG05717	S	-	Uncharacterized protein	1378	3	0	0	0	0	0	0	0	0	0.9586	0.1378	0	0	0
arCOG03817	S	-	Uncharacterized protein	1378	3	0	0	0	0	0	0	0	0	1	0.1378	0	0	0
arCOG05830	S	-	Predicted membrane protein	1310	3	0	0	0	0	0	0	0	0	0.5782	0.131	0	0	0
arCOG11300	S	-	Uncharacterized protein	943	2	0	0	0	0	0	0	0	0	0.0943	0.1142	0	0	0
arCOG03782	S	-	Uncharacterized protein	753	2	0	0	0	0	0	0	0	0	1	0.0753	0	0	0
arCOG13499	S	-	Uncharacterized protein, DUF4125 family	732	2	0	0	0	0	0	0	0	0	0.0732	0.1378	0	0	0
arCOG03796	T	-	Inactivated KaiC-like ATPase, DUF835 family	625	2	0	0	0	0	0	0	0	0	0.709	0.0625	0	0	0
arCOG03804	T	-	Membrane associated inactivated KaiC-like ATPase, DUF835 family	625	2	0	0	0	0	0	0	0	0	0.4573	0.0625	0	0	0
arCOG03803	T	-	Membrane associated inactivated KaiC-like ATPase, DUF835 family	625	2	0	0	0	0	0	0	0	0	1	0.0625	0	0	0
arCOG13134	V	Cas8	CRISPR associated protein Cas8-like, large subunit of CASCADE complex	753	2	0	0	0	0	0	0	0	0	0.2035	0.0753	0	0	0
arCOG				R[C.Desulfurococci,C.Sulfolobi,C.Thermoprotei,E.Thermococci,Korarchaeota,Thaumarchaeota]		C.Desulfurococci	C.Sulfolobi	C.Thermoprotei	E.Archaeoglobi	E.Halobacteria	E.Methanobacteria	E.Methanococci	E.Methanomicrobia	E.Thermococci	E.Thermoplasmata	Korarchaeota	Nanoarchaeota	Thaumarchaeota
arCOG00552	L	-	DNA replication initiation complex subunit, GINS23 family	10000	3	1	1	1	0	0	0	0	0	1	0	1	0	1
arCOG00749	E	DppC	ABC-type dipeptide/oligopeptide/nickel transport system, permease component	9428	3	0.9428	1	1	0	0	0	0	0	1	0	1	0	1
arCOG01672	R	-	Extracellular solute-binding protein with Ig-fold domain	3309	3	1	0.3309	1	0	0	0	0	0	1	0	1	0	1
arCOG04056	K	ArsR	Transcriptional regulator containing HTH domain, ArsR family	1369	3	0.7668	0.4987	0.6852	0	0	0	0	0	0.1753	0	1	0	0.1369
arCOG03770	S	-	Zn finger protein	1244	3	1	0.8442	1	0	0	0	0	0	0.1244	0	1	0	0.9185
arCOG				R[E.Thermococci,Thaumarchaeota]		C.Desulfurococci	C.Sulfolobi	C.Thermoprotei	E.Archaeoglobi	E.Halobacteria	E.Methanobacteria	E.Methanococci	E.Methanomicrobia	E.Thermococci	E.Thermoplasmata	Korarchaeota	Nanoarchaeota	Thaumarchaeota
arCOG11048	S	-	Uncharacterized protein	1908	3	0	0	0	0	0	0	0	0	0.292	0	0	0	0.1908
arCOG11950	S	-	Uncharacterized protein	1369	3	0	0	0	0	0	0	0	0	0.1483	0	0	0	0.1369
arCOG08791	M	-	Glycosyl hydrolases family 35	923	2	0	0	0	0	0	0	0	0	0.0923	0	0	0	0.5734
arCOG10269	S	-	Uncharacterized protein	10.29	1	0	0	0	0	0.0269	0	0	0	0.2769	0	0	0	0.2896
arCOG				R[E.Thermococci,Korarchaeota]		C.Desulfurococci	C.Sulfolobi	C.Thermoprotei	E.Archaeoglobi	E.Halobacteria	E.Methanobacteria	E.Methanococci	E.Methanomicrobia	E.Thermococci	E.Thermoplasmata	Korarchaeota	Nanoarchaeota	Thaumarchaeota
arCOG05754	K	-	Transcriptional regulator, contains HTH domain	7590	3	0	0	0	0	0	0	0	0	0.759	0	1	0	0
arCOG07140	V	Mrr	Restriction endonuclease	6774	3	0	0	0	0	0	0	0	0	0.6774	0	1	0	0
arCOG07087	E	-	Membrane associated metal dependent protease	5784	3	0	0	0	0	0	0	0	0	0.5784	0	1	0	0
arCOG07842	S	-	Uncharacterized protein	2135	3	0	0	0	0	0	0	0	0	0.2135	0	1	0	0
arCOG11995	S	-	Uncharacterized protein	1783	3	0	0	0	0	0	0	0	0	0.1783	0	1	0	0
arCOG				R[C.Desulfurococci,E.Thermococci]		C.Desulfurococci	C.Sulfolobi	C.Thermoprotei	E.Archaeoglobi	E.Halobacteria	E.Methanobacteria	E.Methanococci	E.Methanomicrobia	E.Thermococci	E.Thermoplasmata	Korarchaeota	Nanoarchaeota	Thaumarchaeota
arCOG04222	S	-	Uncharacterized protein	6211	3	0.6211	0	0	0	0	0	0	0	0.7903	0	0	0	0
arCOG03820	S	-	Uncharacterized membrane protein	3099	3	0.3099	0	0	0	0	0	0	0	1	0	0	0	0
arCOG01856	O	PaaD	Metal-sulfur cluster biosynthetic enzyme	2575	3	0.2575	0	0	0	0	0	0	0	0.8825	0	0	0	0
arCOG10656	C	-	Ferredoxin-like protein	1942	3	0.1942	0	0	0	0	0	0	0	0.2356	0	0	0	0
arCOG05835	G	-	MFS family permease	1606	3	0.1606	0	0	0	0	0	0	0	0.7965	0	0	0	0
arCOG13735	S	-	Uncharacterized protein	1598	3	0.223	0	0	0	0	0	0	0	0.1598	0	0	0	0
arCOG05872	S	-	Uncharacterized membrane protein	1532	3	0.1532	0	0	0	0	0	0	0	1	0	0	0	0
arCOG05844	S	-	Uncharacterized protein	1100	3	0.11	0	0	0	0	0	0	0	1	0	0	0	0
arCOG13981	S	-	Uncharacterized protein	996	2	0.113	0	0	0	0	0	0	0	0.0996	0	0	0	0
arCOG07157	S	-	Uncharacterized protein	676	2	0.0676	0	0	0	0	0	0	0	0.503	0	0	0	0
arCOG12955	V	-	Restriction endonuclease family protein	607	2	0.11	0	0	0	0	0	0	0	0.0607	0	0	0	0
arCOG10362	S	-	Uncharacterized protein	569	2	0.2853	0	0	0	0	0	0	0	0.0569	0	0	0	0
arCOG10611	S	-	Uncharacterized protein	562	2	0.0562	0	0	0	0	0	0	0	0.1282	0	0	0	0
arCOG12465	S	-	Uncharacterized protein	553	2	0.1073	0	0	0	0	0	0	0	0.0553	0	0	0	0
arCOG10860	S	-	Uncharacterized protein	511	2	0.0511	0	0	0	0	0	0	0	0.2049	0	0	0	0
arCOG10923	S	-	Uncharacterized protein	442	2	0.0442	0	0	0	0	0	0	0	0.0569	0	0	0	0
arCOG02168	E	-	Transglutaminase-like cysteine protease	442	2	0.0442	0	0	0	0	0	0	0	0.8922	0	0	0	0
arCOG10428	V	-	Pab1 related restriction endonuclease	414	2	0.1287	0	0	0	0	0	0	0	0.0414	0	0	0	0
arCOG07843	S	-	Uncharacterized protein	349	2	0.0349	0	0	0	0	0	0	0	0.1862	0	0	0	0
arCOG				R[C.Sulfolobi,E.Thermococci]		C.Desulfurococci	C.Sulfolobi	C.Thermoprotei	E.Archaeoglobi	E.Halobacteria	E.Methanobacteria	E.Methanococci	E.Methanomicrobia	E.Thermococci	E.Thermoplasmata	Korarchaeota	Nanoarchaeota	Thaumarchaeota
arCOG07940	X	-	Uncharacterized membrane protein, virus associated	2733	3	0	0.4674	0	0	0	0	0	0	0.2733	0	0	0	0
arCOG01142	T	CpdA	3',5'-cyclic AMP phosphodiesterase CpdA	2029	3	0	0.2029	0	0	0	0	0	0	0.9586	0	0	0	0
arCOG08488	S	-	Uncharacterized protein	1811	3	0	0.1811	0	0	0	0	0	0	0.3597	0	0	0	0
arCOG15118	S	-	Uncharacterized protein	621	2	0	0.1241	0	0	0	0	0	0	0.0621	0	0	0	0
arCOG08463	S	-	Uncharacterized conserved coiled-coil protein	621	2	0	0.2376	0	0	0	0	0	0	0.0621	0	0	0	0
arCOG06002	R	-	Cell surface protein	569	2	0	1	0	0	0	0	0	0	0.0569	0	0	0	0
arCOG07200	S	-	Uncharacterized protein	484	2	0	0.4746	0	0	0	0	0	0	0.0484	0	0	0	0
arCOG				R[C.Thermoprotei,E.Thermococci]		C.Desulfurococci	C.Sulfolobi	C.Thermoprotei	E.Archaeoglobi	E.Halobacteria	E.Methanobacteria	E.Methanococci	E.Methanomicrobia	E.Thermococci	E.Thermoplasmata	Korarchaeota	Nanoarchaeota	Thaumarchaeota
arCOG01118	K	-	DNA-binding transcriptional regulator, Lrp family	9431	3	0	0	1	0	0	0	0	0	0.9431	0	0	0	0
arCOG01519	G	FrvX	Cellulase M or related protein	4700	3	0	0	0.47	0	0	0	0	0	0.7836	0	0	0	0
arCOG01913	O	-	Membrane protein implicated in regulation of membrane protease activity	3258	3	0	0	0.3258	0	0	0	0	0	0.7733	0	0	0	0
arCOG00876	K	SSL2	DNA or RNA helicase of superfamily II	2642	3	0	0	1	0	0	0	0	0	0.2642	0	0	0	0
arCOG07086	R	-	Cell surface protein	2439	3	0	0	0.2439	0	0	0	0	0	0.5082	0	0	0	0
arCOG05839	S	-	Uncharacterized protein	2107	3	0	0	0.2107	0	0	0	0	0	0.8874	0	0	0	0
arCOG05836	R	-	RNAse III distant homolog	2107	3	0	0	0.2107	0	0	0	0	0	1	0	0	0	0
arCOG03829	S	-	Uncharacterized protein	2107	3	0	0	0.2107	0	0	0	0	0	0.296	0	0	0	0
arCOG02224	V	VapC	PIN domain containing protein	2107	3	0	0	0.2107	0	0	0	0	0	0.5409	0	0	0	0
arCOG00137	G	-	MFS family permease	2107	3	0	0	0.2107	0	0	0	0	0	0.6705	0	0	0	0
arCOG07159	R	-	HAD superfamily hydrolase	1780	3	0	0	0.2107	0	0	0	0	0	0.178	0	0	0	0
arCOG07158	G	ATH1	Sugar hydrolase/phosphorylase	1780	3	0	0	0.2107	0	0	0	0	0	0.178	0	0	0	0
arCOG05727	S	-	Uncharacterized membrane protein	1674	3	0	0	0.1738	0	0	0	0	0	0.1674	0	0	0	0
arCOG09839	S	-	Uncharacterized protein	1114	3	0	0	0.1114	0	0	0	0	0	0.1228	0	0	0	0
arCOG11084	S	-	Uncharacterized protein	1027	3	0	0	0.1027	0	0	0	0	0	0.2035	0	0	0	0
arCOG00281	L	-	HerA-like helicase	732	2	0	0	0.2211	0	0	0	0	0	0.0732	0	0	0	0
arCOG03831	S	-	Uncharacterized protein	526	2	0	0	0.0526	0	0	0	0	0	0.4341	0	0	0	0
arCOG08627	I	-	Alkaline ceramidase	509	2	0	0	0.3846	0	0	0	0	0	0.0509	0	0	0	0
arCOG07451	R	-	Uncharacterized protein containing SIS (Sugar ISomerase) phosphosugar binding domain	509	2	0	0	0.3846	0	0	0	0	0	0.0509	0	0	0	0
arCOG03173	R	-	AAA+ superfamily ATPase	414	2	0	0	0.0416	0	0	0	0	0	0.0414	0	0	0	0
arCOG05775	S	-	Uncharacterized protein	289	2	0	0	0.0289	0	0	0	0	0	1	0	0	0	0
arCOG15196	S	-	Uncharacterized protein	286	2	0	0	0.108	0	0	0	0	0	0.0286	0	0	0	0
				R[E.Thermococci,Nanoarchaeota]		C.Desulfurococci	C.Sulfolobi	C.Thermoprotei	E.Archaeoglobi	E.Halobacteria	E.Methanobacteria	E.Methanococci	E.Methanomicrobia	E.Thermococci	E.Thermoplasmata	Korarchaeota	Nanoarchaeota	Thaumarchaeota
arCOG00122	J	TrmA	tRNA (uracil-54, C5)-methyltransferase	10000	3	0	0	0	0	0	0	0	0	1	0	0	1	0
arCOG05859	M	-	S-layer domain	5000	3	0	0	0	0	0	0	0	0	0.9077	0	0	0.5	0
arCOG05748	S	-	Uncharacterized protein	5000	3	0	0	0	0	0	0	0	0	0.7965	0	0	0.5	0
